# Supplementary material for: Quantifying the role of weather on seasonal influenza
Source: BMC Public Health. 2016 May 26;16:441. doi: 10.1186/s12889-016-3114-x (PMC4881007; doi:10.1186/s12889-016-3114-x)
Supplement: Additional file 1: — Meteorological data description. (PDF 211 kb) [file 12889_2016_3114_MOESM1_ESM.pdf]

### Additional Material 1: Meteorological data

| Meteorological parameter               | Unity                  | Definition                                                                                                                               |
|----------------------------------------|------------------------|------------------------------------------------------------------------------------------------------------------------------------------|
| Rainfalls height                       | <i>mm</i>              | Rainfalls height collected between 6 am the D-Day and 6 am the following day.                                                            |
| Minimal temperature                    | C°                     | Minimal temperature collected under shelter between 6 am the day before and 6 am the D-Day.                                              |
| Maximal temperature                    | C°                     | Maximal temperature collected under shelter between 6 am the day before and 6 am the D-Day.                                              |
| Average temperature                    | C°                     | Average of 24 hourly values (from 1 am to 12 pm) of air temperature collected under shelter.                                             |
| Wind speed                             | <i>m/s</i>             | Average of 24 hourly values (from 1 am to 12 pm) of wind speed averaged over 10 minutes (measure height: 10 m).                          |
| Minimal relative humidity              | %                      | Minimum of relative humidity collected under shelter between 0 am the D-Day and 0 am the day after.                                      |
| Maximal relative humidity              | %                      | Maximum of relative humidity collected under shelter between 0 am the D-Day and 0 am the day after.                                      |
| Average relative Humidity <sup>1</sup> | %                      | Average of 24 hourly values (from 1 am to 12 pm) of relative humidity collected under shelter.                                           |
| Minimal absolute humidity              | <i>g/m<sup>3</sup></i> | Minimum of absolute humidity collected under shelter between 0 am the D-Day and 0 am the day after.                                      |
| Maximal Absolute Humidity              | <i>g/m<sup>3</sup></i> | Maximum of absolute humidity collected under shelter between 0 am the D-Day and 0 am the day after.                                      |
| Average absolute humidity <sup>2</sup> | <i>g/m<sup>3</sup></i> | Average of 24 hourly values (from 1 am to 12 pm) of absolute humidity collected under shelter.                                           |
| Sunshine duration                      | minutes                | Duration between 0 am and 12 pm during which solar radiation is of sufficient intensity ( $> 120W/m^{-2}$ ) to produce distinct shadows. |

---

<sup>1</sup> Relative humidity is the ratio of the actual amount of water vapor contained in the air to the maximum amount that the air can hold according to its temperature.

<sup>2</sup> Absolute humidity is the amount of water vapor contained in the air.
