# Supplementary material for: Quantifying the role of weather on seasonal influenza
Source: Springer Nature journal article supplement (doi:10.1186/s12889-016-3114-x), 2016-05-26
Supplement: MOESM2 [file 10206070]

**Additional Material 2: The homoscedasticity of the residuals**

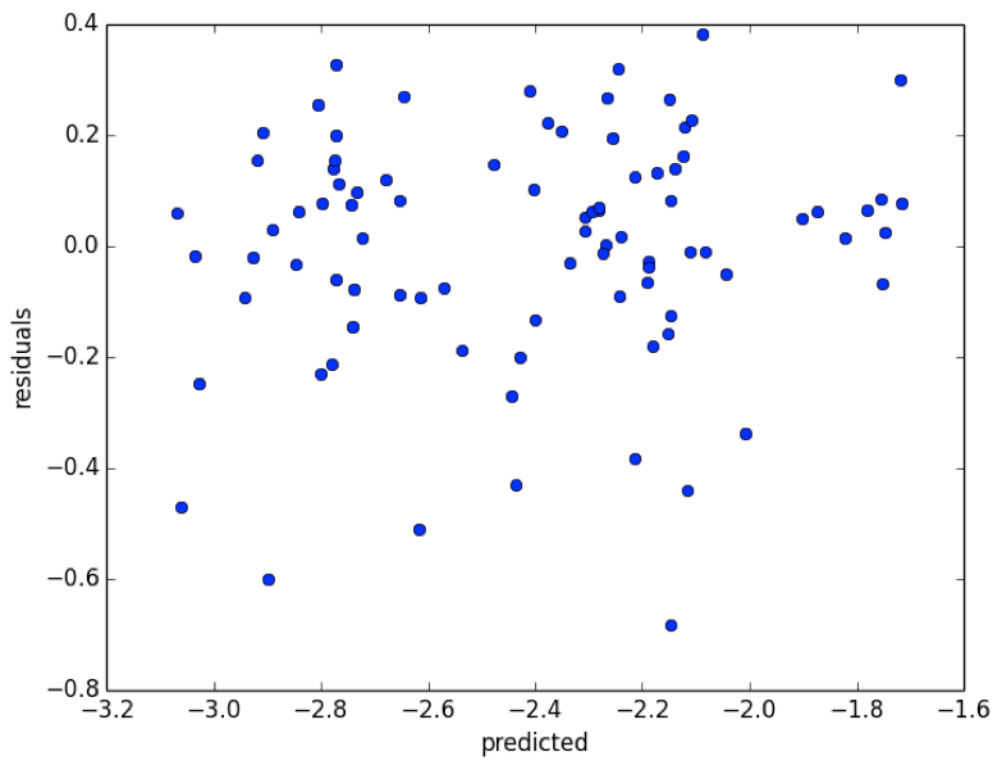

Figure S1 - Residuals versus predicted values of the model built at the epidemic scale explaining the logarithm of the epidemic size according to epidemic year and region as random variables.
