# Supplementary material for: Quantifying the role of weather on seasonal influenza
Source: Springer Nature journal article supplement (doi:10.1186/s12889-016-3114-x), 2016-05-26
Supplement: MOESM3 [file 10206070]

| Region    | ID_Week (year+number) | Incidence (per 100000 inhabitants) |
|-----------|-----------------------|------------------------------------|
| Aquitaine | 200341                | NA                                 |
| Aquitaine | 200342                | 0                                  |
| Aquitaine | 200343                | 109.2727                           |
| Aquitaine | 200344                | 225.1212                           |
| Aquitaine | 200345                | 517.3975                           |
| Aquitaine | 200346                | 632.6666                           |
| Aquitaine | 200347                | 1234.293                           |
| Aquitaine | 200348                | 1735.625                           |
| Aquitaine | 200349                | 2218.8                             |
| Aquitaine | 200350                | 1975.8                             |
| Aquitaine | 200351                | 1095.611                           |
| Aquitaine | 200352                | 504                                |
| Aquitaine | 200401                | 87.41667                           |
| Aquitaine | 200402                | 0                                  |
| Aquitaine | 200403                | 0                                  |
| Aquitaine | 200404                | 0                                  |
| Aquitaine | 200405                | NA                                 |
| Aquitaine | 200406                | NA                                 |
| Aquitaine | 200407                | NA                                 |
| Aquitaine | 200408                | NA                                 |
| Aquitaine | 200409                | NA                                 |
| Aquitaine | 200410                | NA                                 |
| Aquitaine | 200411                | NA                                 |
| Aquitaine | 200412                | NA                                 |
| Aquitaine | 200413                | NA                                 |
| Aquitaine | 200414                | NA                                 |
| Aquitaine | 200441                | 0                                  |
| Aquitaine | 200442                | 0                                  |
| Aquitaine | 200443                | 0                                  |
| Aquitaine | 200444                | 0                                  |
| Aquitaine | 200445                | 0                                  |
| Aquitaine | 200446                | 0                                  |
| Aquitaine | 200447                | 0                                  |
| Aquitaine | 200448                | 0                                  |
| Aquitaine | 200449                | 0                                  |
| Aquitaine | 200450                | 0                                  |
| Aquitaine | 200451                | 0                                  |
| Aquitaine | 200452                | 201.1111                           |
| Aquitaine | 200453                | 240.4444                           |
| Aquitaine | 200501                | 425.8111                           |
| Aquitaine | 200502                | 577.7273                           |
| Aquitaine | 200503                | 1100.879                           |
| Aquitaine | 200504                | 1531.561                           |
| Aquitaine | 200505                | 2067.6                             |
| Aquitaine | 200506                | 2271.471                           |

|           |        |          |
|-----------|--------|----------|
| Aquitaine | 200507 | 2308.602 |
| Aquitaine | 200508 | 1448.495 |
| Aquitaine | 200509 | 876.8619 |
| Aquitaine | 200510 | 704.0444 |
| Aquitaine | 200511 | 704.6667 |
| Aquitaine | 200512 | NA       |
| Aquitaine | 200513 | NA       |
| Aquitaine | 200514 | NA       |
| Aquitaine | 200541 | NA       |
| Aquitaine | 200542 | NA       |
| Aquitaine | 200543 | 0        |
| Aquitaine | 200544 | 0        |
| Aquitaine | 200545 | 0        |
| Aquitaine | 200546 | 0        |
| Aquitaine | 200547 | 0        |
| Aquitaine | 200548 | 0        |
| Aquitaine | 200549 | 0        |
| Aquitaine | 200550 | 0        |
| Aquitaine | 200551 | 186.6667 |
| Aquitaine | 200552 | 191.1111 |
| Aquitaine | 200601 | 174      |
| Aquitaine | 200602 | 373.75   |
| Aquitaine | 200603 | 639.1666 |
| Aquitaine | 200604 | 1097.087 |
| Aquitaine | 200605 | 999.6429 |
| Aquitaine | 200606 | 841.4603 |
| Aquitaine | 200607 | 762.4    |
| Aquitaine | 200608 | 449.0667 |
| Aquitaine | 200609 | 476.4    |
| Aquitaine | 200610 | 875.5546 |
| Aquitaine | 200611 | 1016.167 |
| Aquitaine | 200612 | 1217.466 |
| Aquitaine | 200613 | 1012.032 |
| Aquitaine | 200614 | 557.3333 |
| Aquitaine | 200641 | NA       |
| Aquitaine | 200642 | 0        |
| Aquitaine | 200643 | 0        |
| Aquitaine | 200644 | 0        |
| Aquitaine | 200645 | 0        |
| Aquitaine | 200646 | 0        |
| Aquitaine | 200647 | 104.4667 |
| Aquitaine | 200648 | 130.8667 |
| Aquitaine | 200649 | 118.8    |
| Aquitaine | 200650 | 0        |
| Aquitaine | 200651 | 0        |
| Aquitaine | 200652 | 0        |

|           |        |          |
|-----------|--------|----------|
| Aquitaine | 200701 | 397.4    |
| Aquitaine | 200702 | 462      |
| Aquitaine | 200703 | 881.7926 |
| Aquitaine | 200704 | 978.824  |
| Aquitaine | 200705 | 1773.981 |
| Aquitaine | 200706 | 2572.4   |
| Aquitaine | 200707 | 1563.794 |
| Aquitaine | 200708 | 917.1556 |
| Aquitaine | 200709 | NA       |
| Aquitaine | 200710 | NA       |
| Aquitaine | 200711 | NA       |
| Aquitaine | 200712 | NA       |
| Aquitaine | 200713 | NA       |
| Aquitaine | 200714 | NA       |
| Aquitaine | 200741 | 0        |
| Aquitaine | 200742 | 0        |
| Aquitaine | 200743 | 0        |
| Aquitaine | 200744 | 0        |
| Aquitaine | 200745 | 0        |
| Aquitaine | 200746 | 0        |
| Aquitaine | 200747 | 0        |
| Aquitaine | 200748 | 152.5833 |
| Aquitaine | 200749 | 309.3    |
| Aquitaine | 200750 | 325.35   |
| Aquitaine | 200751 | 460.6222 |
| Aquitaine | 200752 | 835.7778 |
| Aquitaine | 200801 | 465.7778 |
| Aquitaine | 200802 | 534.4445 |
| Aquitaine | 200803 | 443.7859 |
| Aquitaine | 200804 | 879.0889 |
| Aquitaine | 200805 | 1219.728 |
| Aquitaine | 200806 | 1313.5   |
| Aquitaine | 200807 | 1514.917 |
| Aquitaine | 200808 | 760      |
| Aquitaine | 200809 | 451.7333 |
| Aquitaine | 200810 | 279.5333 |
| Aquitaine | 200811 | 484.8    |
| Aquitaine | 200812 | NA       |
| Aquitaine | 200813 | NA       |
| Aquitaine | 200814 | NA       |
| Aquitaine | 200841 | 0        |
| Aquitaine | 200842 | 0        |
| Aquitaine | 200843 | 0        |
| Aquitaine | 200844 | 0        |
| Aquitaine | 200845 | 0        |
| Aquitaine | 200846 | 0        |

|           |        |          |
|-----------|--------|----------|
| Aquitaine | 200847 | 0        |
| Aquitaine | 200848 | 0        |
| Aquitaine | 200849 | 180.4444 |
| Aquitaine | 200850 | 412.4    |
| Aquitaine | 200851 | 991.8    |
| Aquitaine | 200852 | 1063.822 |
| Aquitaine | 200901 | 196.7399 |
| Aquitaine | 200902 | 1576.677 |
| Aquitaine | 200903 | 2040.764 |
| Aquitaine | 200904 | 1951.295 |
| Aquitaine | 200905 | 1392.857 |
| Aquitaine | 200906 | 1087.422 |
| Aquitaine | 200907 | 521.0528 |
| Aquitaine | 200908 | 764.75   |
| Aquitaine | 200909 | 388.125  |
| Aquitaine | 200910 | 535.5    |
| Aquitaine | 200911 | 452.6667 |
| Aquitaine | 200912 | 710.0001 |
| Aquitaine | 200913 | 674.3334 |
| Aquitaine | 200914 | NA       |
| Aquitaine | 201041 | 0        |
| Aquitaine | 201042 | NA       |
| Aquitaine | 201043 | NA       |
| Aquitaine | 201044 | NA       |
| Aquitaine | 201045 | NA       |
| Aquitaine | 201046 | NA       |
| Aquitaine | 201047 | 0        |
| Aquitaine | 201048 | 0        |
| Aquitaine | 201049 | 120.3333 |
| Aquitaine | 201050 | 290.85   |
| Aquitaine | 201051 | 264.6    |
| Aquitaine | 201052 | 231.3667 |
| Aquitaine | 201101 | 772.6889 |
| Aquitaine | 201102 | 894.2    |
| Aquitaine | 201103 | 1258.948 |
| Aquitaine | 201104 | 811.2674 |
| Aquitaine | 201105 | 669.8269 |
| Aquitaine | 201106 | 127.125  |
| Aquitaine | 201107 | 456.25   |
| Aquitaine | 201108 | NA       |
| Aquitaine | 201109 | NA       |
| Aquitaine | 201110 | NA       |
| Aquitaine | 201111 | 112.2222 |
| Aquitaine | 201112 | 108      |
| Aquitaine | 201113 | 132.3333 |
| Aquitaine | 201114 | NA       |

|           |        |          |
|-----------|--------|----------|
| Aquitaine | 201141 | NA       |
| Aquitaine | 201142 | 0        |
| Aquitaine | 201143 | 0        |
| Aquitaine | 201144 | 0        |
| Aquitaine | 201145 | 0        |
| Aquitaine | 201146 | 89.57143 |
| Aquitaine | 201147 | 92.09524 |
| Aquitaine | 201148 | 89.47619 |
| Aquitaine | 201149 | 0        |
| Aquitaine | 201150 | NA       |
| Aquitaine | 201151 | NA       |
| Aquitaine | 201152 | NA       |
| Aquitaine | 201201 | 0        |
| Aquitaine | 201202 | 162.5    |
| Aquitaine | 201203 | 202.6667 |
| Aquitaine | 201204 | 261.5667 |
| Aquitaine | 201205 | 292      |
| Aquitaine | 201206 | 1046.229 |
| Aquitaine | 201207 | 1938.886 |
| Aquitaine | 201208 | 1955.357 |
| Aquitaine | 201209 | 1623.611 |
| Aquitaine | 201210 | 1190.139 |
| Aquitaine | 201211 | 877      |
| Aquitaine | 201212 | 650.3111 |
| Aquitaine | 201213 | 439.4667 |
| Aquitaine | 201214 | 199.85   |
| Aquitaine | 201241 | NA       |
| Aquitaine | 201242 | NA       |
| Aquitaine | 201243 | 0        |
| Aquitaine | 201244 | 0        |
| Aquitaine | 201245 | 0        |
| Aquitaine | 201246 | 252      |
| Aquitaine | 201247 | 264.2222 |
| Aquitaine | 201248 | 578.7302 |
| Aquitaine | 201249 | 547.5619 |
| Aquitaine | 201250 | 1165.5   |
| Aquitaine | 201251 | 1551.044 |
| Aquitaine | 201252 | 1304.5   |
| Aquitaine | 201301 | 802.2    |
| Aquitaine | 201302 | 921.8223 |
| Aquitaine | 201303 | 738.2667 |
| Aquitaine | 201304 | 1400.8   |
| Aquitaine | 201305 | 2196.6   |
| Aquitaine | 201306 | 1400.5   |
| Aquitaine | 201307 | 2383.383 |
| Aquitaine | 201308 | 2826.75  |

|                |        |          |
|----------------|--------|----------|
| Aquitaine      | 201309 | 1320.7   |
| Aquitaine      | 201310 | NA       |
| Aquitaine      | 201311 | NA       |
| Aquitaine      | 201312 | NA       |
| Aquitaine      | 201313 | NA       |
| Aquitaine      | 201314 | NA       |
| Lower Normandy | 200341 | 0        |
| Lower Normandy | 200342 | 0        |
| Lower Normandy | 200343 | 75.80952 |
| Lower Normandy | 200344 | 63.71429 |
| Lower Normandy | 200345 | 216.1889 |
| Lower Normandy | 200346 | 501.7496 |
| Lower Normandy | 200347 | 1367.147 |
| Lower Normandy | 200348 | 1755.762 |
| Lower Normandy | 200349 | 2247.477 |
| Lower Normandy | 200350 | 1994.238 |
| Lower Normandy | 200351 | 1838.419 |
| Lower Normandy | 200352 | 666.269  |
| Lower Normandy | 200401 | 365.3333 |
| Lower Normandy | 200402 | 109.4667 |
| Lower Normandy | 200403 | 89.13334 |
| Lower Normandy | 200404 | 0        |
| Lower Normandy | 200405 | 0        |
| Lower Normandy | 200406 | 0        |
| Lower Normandy | 200407 | 0        |
| Lower Normandy | 200408 | 0        |
| Lower Normandy | 200409 | 0        |
| Lower Normandy | 200410 | 0        |
| Lower Normandy | 200411 | 0        |
| Lower Normandy | 200412 | 0        |
| Lower Normandy | 200413 | NA       |
| Lower Normandy | 200414 | NA       |
| Lower Normandy | 200441 | 0        |
| Lower Normandy | 200442 | 0        |
| Lower Normandy | 200443 | 0        |
| Lower Normandy | 200444 | 0        |
| Lower Normandy | 200445 | 0        |
| Lower Normandy | 200446 | 0        |
| Lower Normandy | 200447 | 0        |
| Lower Normandy | 200448 | 0        |
| Lower Normandy | 200449 | 0        |
| Lower Normandy | 200450 | 0        |
| Lower Normandy | 200451 | 0        |
| Lower Normandy | 200452 | 120.8889 |
| Lower Normandy | 200453 | 173.963  |
| Lower Normandy | 200501 | 266.7104 |

|                |        |          |
|----------------|--------|----------|
| Lower Normandy | 200502 | 278.7738 |
| Lower Normandy | 200503 | 429.5272 |
| Lower Normandy | 200504 | 583.9719 |
| Lower Normandy | 200505 | 826.3167 |
| Lower Normandy | 200506 | 1370.083 |
| Lower Normandy | 200507 | 1408.036 |
| Lower Normandy | 200508 | 909.8773 |
| Lower Normandy | 200509 | 711.5594 |
| Lower Normandy | 200510 | 1064.463 |
| Lower Normandy | 200511 | 995.6    |
| Lower Normandy | 200512 | 953.7667 |
| Lower Normandy | 200513 | 788.3333 |
| Lower Normandy | 200514 | 483.6333 |
| Lower Normandy | 200541 | 0        |
| Lower Normandy | 200542 | 0        |
| Lower Normandy | 200543 | 0        |
| Lower Normandy | 200544 | 0        |
| Lower Normandy | 200545 | 26.16667 |
| Lower Normandy | 200546 | 30.19444 |
| Lower Normandy | 200547 | 41.75    |
| Lower Normandy | 200548 | 0        |
| Lower Normandy | 200549 | 0        |
| Lower Normandy | 200550 | 27.65    |
| Lower Normandy | 200551 | 26.51667 |
| Lower Normandy | 200552 | 27.91667 |
| Lower Normandy | 200601 | 37.41026 |
| Lower Normandy | 200602 | 90.76923 |
| Lower Normandy | 200603 | 201.1218 |
| Lower Normandy | 200604 | 361.2647 |
| Lower Normandy | 200605 | 900.4064 |
| Lower Normandy | 200606 | 1208.629 |
| Lower Normandy | 200607 | 1691.3   |
| Lower Normandy | 200608 | 952.1143 |
| Lower Normandy | 200609 | 480.675  |
| Lower Normandy | 200610 | 282.9917 |
| Lower Normandy | 200611 | 436.875  |
| Lower Normandy | 200612 | 376.4    |
| Lower Normandy | 200613 | 265.3    |
| Lower Normandy | 200614 | 137.55   |
| Lower Normandy | 200641 | NA       |
| Lower Normandy | 200642 | NA       |
| Lower Normandy | 200643 | 0        |
| Lower Normandy | 200644 | 0        |
| Lower Normandy | 200645 | 0        |
| Lower Normandy | 200646 | 0        |
| Lower Normandy | 200647 | 0        |

|                |        |          |
|----------------|--------|----------|
| Lower Normandy | 200648 | 0        |
| Lower Normandy | 200649 | 0        |
| Lower Normandy | 200650 | 0        |
| Lower Normandy | 200651 | 79.91667 |
| Lower Normandy | 200652 | 297.675  |
| Lower Normandy | 200701 | 310.4222 |
| Lower Normandy | 200702 | 397.4857 |
| Lower Normandy | 200703 | 395.9471 |
| Lower Normandy | 200704 | 516.4161 |
| Lower Normandy | 200705 | 867.6373 |
| Lower Normandy | 200706 | 1330.836 |
| Lower Normandy | 200707 | 1316.875 |
| Lower Normandy | 200708 | 700.825  |
| Lower Normandy | 200709 | 268.4083 |
| Lower Normandy | 200710 | 319      |
| Lower Normandy | 200711 | 136.4286 |
| Lower Normandy | 200712 | 303.6429 |
| Lower Normandy | 200713 | NA       |
| Lower Normandy | 200714 | NA       |
| Lower Normandy | 200741 | 0        |
| Lower Normandy | 200742 | 0        |
| Lower Normandy | 200743 | 0        |
| Lower Normandy | 200744 | 39.54167 |
| Lower Normandy | 200745 | 43.79167 |
| Lower Normandy | 200746 | 38.95834 |
| Lower Normandy | 200747 | 0        |
| Lower Normandy | 200748 | 0        |
| Lower Normandy | 200749 | 68.47619 |
| Lower Normandy | 200750 | 241.2699 |
| Lower Normandy | 200751 | 304.14   |
| Lower Normandy | 200752 | 339.3464 |
| Lower Normandy | 200801 | 314.1448 |
| Lower Normandy | 200802 | 371.1615 |
| Lower Normandy | 200803 | 441.1397 |
| Lower Normandy | 200804 | 552.4522 |
| Lower Normandy | 200805 | 522.8334 |
| Lower Normandy | 200806 | 562.2783 |
| Lower Normandy | 200807 | 669.4802 |
| Lower Normandy | 200808 | 645.3402 |
| Lower Normandy | 200809 | 389.2034 |
| Lower Normandy | 200810 | 368.5662 |
| Lower Normandy | 200811 | 350.4306 |
| Lower Normandy | 200812 | 444      |
| Lower Normandy | 200813 | 325.8333 |
| Lower Normandy | 200814 | 313.3333 |
| Lower Normandy | 200841 | NA       |



|                |        |          |
|----------------|--------|----------|
| Lower Normandy | 200842 | 0        |
| Lower Normandy | 200843 | 0        |
| Lower Normandy | 200844 | 0        |
| Lower Normandy | 200845 | 0        |
| Lower Normandy | 200846 | 0        |
| Lower Normandy | 200847 | 0        |
| Lower Normandy | 200848 | 0        |
| Lower Normandy | 200849 | 20.68254 |
| Lower Normandy | 200850 | 155.1631 |
| Lower Normandy | 200851 | 416.2014 |
| Lower Normandy | 200852 | 691.6075 |
| Lower Normandy | 200901 | 887.1705 |
| Lower Normandy | 200902 | 1028.968 |
| Lower Normandy | 200903 | 1225.199 |
| Lower Normandy | 200904 | 1196.51  |
| Lower Normandy | 200905 | 613.9216 |
| Lower Normandy | 200906 | 348.2157 |
| Lower Normandy | 200907 | 77.16666 |
| Lower Normandy | 200908 | 0        |
| Lower Normandy | 200909 | 0        |
| Lower Normandy | 200910 | 0        |
| Lower Normandy | 200911 | 0        |
| Lower Normandy | 200912 | NA       |
| Lower Normandy | 200913 | NA       |
| Lower Normandy | 200914 | NA       |
| Lower Normandy | 201041 | 484.4    |
| Lower Normandy | 201042 | 257.3333 |
| Lower Normandy | 201043 | 0        |
| Lower Normandy | 201044 | 0        |
| Lower Normandy | 201045 | 27.44444 |
| Lower Normandy | 201046 | 113.9704 |
| Lower Normandy | 201047 | 158.0176 |
| Lower Normandy | 201048 | 327.8036 |
| Lower Normandy | 201049 | 561.756  |
| Lower Normandy | 201050 | 908.0372 |
| Lower Normandy | 201051 | 1314.561 |
| Lower Normandy | 201052 | 1420.662 |
| Lower Normandy | 201101 | 1661.412 |
| Lower Normandy | 201102 | 1468.526 |
| Lower Normandy | 201103 | 1287.718 |
| Lower Normandy | 201104 | 951.707  |
| Lower Normandy | 201105 | 936.4561 |
| Lower Normandy | 201106 | 589.1534 |
| Lower Normandy | 201107 | 366.8926 |
| Lower Normandy | 201108 | 132.4296 |
| Lower Normandy | 201109 | 91.33334 |

|                |        |          |
|----------------|--------|----------|
| Lower Normandy | 201110 | 0        |
| Lower Normandy | 201111 | 0        |
| Lower Normandy | 201112 | NA       |
| Lower Normandy | 201113 | NA       |
| Lower Normandy | 201114 | NA       |
| Lower Normandy | 201141 | NA       |
| Lower Normandy | 201142 | 0        |
| Lower Normandy | 201143 | NA       |
| Lower Normandy | 201144 | NA       |
| Lower Normandy | 201145 | NA       |
| Lower Normandy | 201146 | NA       |
| Lower Normandy | 201147 | 0        |
| Lower Normandy | 201148 | 0        |
| Lower Normandy | 201149 | 0        |
| Lower Normandy | 201150 | 0        |
| Lower Normandy | 201151 | 0        |
| Lower Normandy | 201152 | 0        |
| Lower Normandy | 201201 | 56.06667 |
| Lower Normandy | 201202 | 60.92778 |
| Lower Normandy | 201203 | 147.0722 |
| Lower Normandy | 201204 | 173.0333 |
| Lower Normandy | 201205 | 378.8485 |
| Lower Normandy | 201206 | 564.5727 |
| Lower Normandy | 201207 | 844.0455 |
| Lower Normandy | 201208 | 966.5508 |
| Lower Normandy | 201209 | 807.7674 |
| Lower Normandy | 201210 | 890.6275 |
| Lower Normandy | 201211 | 681.5    |
| Lower Normandy | 201212 | 579.5    |
| Lower Normandy | 201213 | 529.9259 |
| Lower Normandy | 201214 | NA       |
| Lower Normandy | 201241 | 0        |
| Lower Normandy | 201242 | 0        |
| Lower Normandy | 201243 | 0        |
| Lower Normandy | 201244 | 0        |
| Lower Normandy | 201245 | 102.9167 |
| Lower Normandy | 201246 | 94.33334 |
| Lower Normandy | 201247 | 108.25   |
| Lower Normandy | 201248 | 0        |
| Lower Normandy | 201249 | 171.8095 |
| Lower Normandy | 201250 | 339.4445 |
| Lower Normandy | 201251 | 429.4603 |
| Lower Normandy | 201252 | 480.127  |
| Lower Normandy | 201301 | 368.0238 |
| Lower Normandy | 201302 | 475.5952 |
| Lower Normandy | 201303 | 439.3158 |

|                |        |          |
|----------------|--------|----------|
| Lower Normandy | 201304 | 749.1843 |
| Lower Normandy | 201305 | 1065.184 |
| Lower Normandy | 201306 | 1239.912 |
| Lower Normandy | 201307 | 1002.914 |
| Lower Normandy | 201308 | 1012.088 |
| Lower Normandy | 201309 | 1104.992 |
| Lower Normandy | 201310 | 852.7619 |
| Lower Normandy | 201311 | 292.8095 |
| Lower Normandy | 201312 | 127.8333 |
| Lower Normandy | 201313 | 0        |
| Lower Normandy | 201314 | 99.73334 |
| Brittany       | 200341 | 34.48718 |
| Brittany       | 200342 | 208.3077 |
| Brittany       | 200343 | 254.31   |
| Brittany       | 200344 | 324.4424 |
| Brittany       | 200345 | 694.8563 |
| Brittany       | 200346 | 1176.167 |
| Brittany       | 200347 | 1481.626 |
| Brittany       | 200348 | 1913.974 |
| Brittany       | 200349 | 2125.401 |
| Brittany       | 200350 | 1658.429 |
| Brittany       | 200351 | 1517.5   |
| Brittany       | 200352 | 535.2778 |
| Brittany       | 200401 | 344.6667 |
| Brittany       | 200402 | 0        |
| Brittany       | 200403 | 0        |
| Brittany       | 200404 | 0        |
| Brittany       | 200405 | 0        |
| Brittany       | 200406 | NA       |
| Brittany       | 200407 | NA       |
| Brittany       | 200408 | NA       |
| Brittany       | 200409 | NA       |
| Brittany       | 200410 | NA       |
| Brittany       | 200411 | NA       |
| Brittany       | 200412 | NA       |
| Brittany       | 200413 | NA       |
| Brittany       | 200414 | NA       |
| Brittany       | 200441 | 0        |
| Brittany       | 200442 | 0        |
| Brittany       | 200443 | 0        |
| Brittany       | 200444 | 0        |
| Brittany       | 200445 | 0        |
| Brittany       | 200446 | 0        |
| Brittany       | 200447 | 0        |
| Brittany       | 200448 | 0        |
| Brittany       | 200449 | 0        |

|          |        |          |
|----------|--------|----------|
| Brittany | 200450 | 0        |
| Brittany | 200451 | 90.25    |
| Brittany | 200452 | 189.7778 |
| Brittany | 200453 | 437.1111 |
| Brittany | 200501 | 303.5397 |
| Brittany | 200502 | 381.0714 |
| Brittany | 200503 | 1049.396 |
| Brittany | 200504 | 1403.934 |
| Brittany | 200505 | 1763.148 |
| Brittany | 200506 | NA       |
| Brittany | 200507 | NA       |
| Brittany | 200508 | NA       |
| Brittany | 200509 | 525.8667 |
| Brittany | 200510 | 683.2778 |
| Brittany | 200511 | 665.3334 |
| Brittany | 200512 | 905      |
| Brittany | 200513 | 458      |
| Brittany | 200514 | 229.3333 |
| Brittany | 200541 | 0        |
| Brittany | 200542 | 0        |
| Brittany | 200543 | 0        |
| Brittany | 200544 | 0        |
| Brittany | 200545 | 0        |
| Brittany | 200546 | 0        |
| Brittany | 200547 | 0        |
| Brittany | 200548 | 0        |
| Brittany | 200549 | 0        |
| Brittany | 200550 | 127.037  |
| Brittany | 200551 | 132.8704 |
| Brittany | 200552 | 426.4167 |
| Brittany | 200601 | 331.6786 |
| Brittany | 200602 | 347.5476 |
| Brittany | 200603 | 447.8571 |
| Brittany | 200604 | 589.314  |
| Brittany | 200605 | 806.9063 |
| Brittany | 200606 | 977.246  |
| Brittany | 200607 | 1020.7   |
| Brittany | 200608 | 1108.326 |
| Brittany | 200609 | 689.8466 |
| Brittany | 200610 | 649.7582 |
| Brittany | 200611 | 476.3518 |
| Brittany | 200612 | 365.9722 |
| Brittany | 200613 | 190.7955 |
| Brittany | 200614 | 191.1364 |
| Brittany | 200641 | 0        |
| Brittany | 200642 | 0        |

|          |        |          |
|----------|--------|----------|
| Brittany | 200643 | 0        |
| Brittany | 200644 | 0        |
| Brittany | 200645 | 0        |
| Brittany | 200646 | 97.08334 |
| Brittany | 200647 | 128.8333 |
| Brittany | 200648 | 189.6667 |
| Brittany | 200649 | 153.1429 |
| Brittany | 200650 | 236.8452 |
| Brittany | 200651 | 409.2024 |
| Brittany | 200652 | 338.4954 |
| Brittany | 200701 | 359.3664 |
| Brittany | 200702 | 419.0972 |
| Brittany | 200703 | 689.1786 |
| Brittany | 200704 | 753.5715 |
| Brittany | 200705 | 1205.88  |
| Brittany | 200706 | 1818.788 |
| Brittany | 200707 | 1373.263 |
| Brittany | 200708 | 470.8658 |
| Brittany | 200709 | 604.3889 |
| Brittany | 200710 | 631      |
| Brittany | 200711 | 581      |
| Brittany | 200712 | 325.5556 |
| Brittany | 200713 | NA       |
| Brittany | 200714 | NA       |
| Brittany | 200741 | 0        |
| Brittany | 200742 | 0        |
| Brittany | 200743 | 0        |
| Brittany | 200744 | 0        |
| Brittany | 200745 | 0        |
| Brittany | 200746 | 0        |
| Brittany | 200747 | 0        |
| Brittany | 200748 | 0        |
| Brittany | 200749 | 74.14815 |
| Brittany | 200750 | 199.0074 |
| Brittany | 200751 | 289.9344 |
| Brittany | 200752 | 339.4286 |
| Brittany | 200801 | 334.9881 |
| Brittany | 200802 | 507.5805 |
| Brittany | 200803 | 432.0658 |
| Brittany | 200804 | 732.126  |
| Brittany | 200805 | 1024.413 |
| Brittany | 200806 | 1118.571 |
| Brittany | 200807 | 1091.677 |
| Brittany | 200808 | 1077.288 |
| Brittany | 200809 | 744.5387 |
| Brittany | 200810 | 483.4259 |

|          |        |          |
|----------|--------|----------|
| Brittany | 200811 | 638.7333 |
| Brittany | 200812 | 762      |
| Brittany | 200813 | 1224.578 |
| Brittany | 200814 | 882      |
| Brittany | 200841 | 0        |
| Brittany | 200842 | 0        |
| Brittany | 200843 | 82.60001 |
| Brittany | 200844 | 55.06667 |
| Brittany | 200845 | 218.6667 |
| Brittany | 200846 | 78.33334 |
| Brittany | 200847 | 92.06667 |
| Brittany | 200848 | 0        |
| Brittany | 200849 | 149.0833 |
| Brittany | 200850 | 501.5    |
| Brittany | 200851 | 862.2    |
| Brittany | 200852 | 1166.409 |
| Brittany | 200901 | 2386.094 |
| Brittany | 200902 | 1919.284 |
| Brittany | 200903 | 1889.482 |
| Brittany | 200904 | 1889.755 |
| Brittany | 200905 | 1147.771 |
| Brittany | 200906 | 459.2699 |
| Brittany | 200907 | 182      |
| Brittany | 200908 | 120.3333 |
| Brittany | 200909 | 220.7333 |
| Brittany | 200910 | 271.1333 |
| Brittany | 200911 | 445.6    |
| Brittany | 200912 | 698.25   |
| Brittany | 200913 | 599.8572 |
| Brittany | 200914 | 442.8571 |
| Brittany | 201041 | NA       |
| Brittany | 201042 | 0        |
| Brittany | 201043 | 0        |
| Brittany | 201044 | 367      |
| Brittany | 201045 | 374.5833 |
| Brittany | 201046 | 825.9722 |
| Brittany | 201047 | 304.8889 |
| Brittany | 201048 | 157.6667 |
| Brittany | 201049 | 160.0833 |
| Brittany | 201050 | 410.25   |
| Brittany | 201051 | 513      |
| Brittany | 201052 | 793.5577 |
| Brittany | 201101 | 944.5641 |
| Brittany | 201102 | 912.9231 |
| Brittany | 201103 | 988.022  |
| Brittany | 201104 | 1482.781 |

|          |        |          |
|----------|--------|----------|
| Brittany | 201105 | 1584.525 |
| Brittany | 201106 | 1027.841 |
| Brittany | 201107 | 1101.513 |
| Brittany | 201108 | 570      |
| Brittany | 201109 | 318.5    |
| Brittany | 201110 | 327.0833 |
| Brittany | 201111 | NA       |
| Brittany | 201112 | NA       |
| Brittany | 201113 | NA       |
| Brittany | 201114 | NA       |
| Brittany | 201141 | NA       |
| Brittany | 201142 | 0        |
| Brittany | 201143 | 0        |
| Brittany | 201144 | NA       |
| Brittany | 201145 | NA       |
| Brittany | 201146 | NA       |
| Brittany | 201147 | NA       |
| Brittany | 201148 | NA       |
| Brittany | 201149 | NA       |
| Brittany | 201150 | 457.9259 |
| Brittany | 201151 | 453.4444 |
| Brittany | 201152 | 554.3334 |
| Brittany | 201201 | 382.6667 |
| Brittany | 201202 | 626.8    |
| Brittany | 201203 | 650.1    |
| Brittany | 201204 | 646      |
| Brittany | 201205 | 654.5    |
| Brittany | 201206 | 886.6    |
| Brittany | 201207 | 822.3857 |
| Brittany | 201208 | 933.2143 |
| Brittany | 201209 | 1130.556 |
| Brittany | 201210 | 1605.333 |
| Brittany | 201211 | 1566.667 |
| Brittany | 201212 | 1541.333 |
| Brittany | 201213 | 1296.078 |
| Brittany | 201214 | 974.7778 |
| Brittany | 201241 | NA       |
| Brittany | 201242 | NA       |
| Brittany | 201243 | NA       |
| Brittany | 201244 | 0        |
| Brittany | 201245 | 0        |
| Brittany | 201246 | 0        |
| Brittany | 201247 | 0        |
| Brittany | 201248 | 88.53334 |
| Brittany | 201249 | 532.4222 |
| Brittany | 201250 | 636      |

|                |        |          |
|----------------|--------|----------|
| Brittany       | 201251 | 1101.222 |
| Brittany       | 201252 | 823.0222 |
| Brittany       | 201301 | 1497.645 |
| Brittany       | 201302 | 640.1    |
| Brittany       | 201303 | 832.7083 |
| Brittany       | 201304 | 932.9375 |
| Brittany       | 201305 | 1648.813 |
| Brittany       | 201306 | 2328.125 |
| Brittany       | 201307 | 2007.365 |
| Brittany       | 201308 | 1763.636 |
| Brittany       | 201309 | 1333.682 |
| Brittany       | 201310 | 862.7936 |
| Brittany       | 201311 | 646.5912 |
| Brittany       | 201312 | 377.3611 |
| Brittany       | 201313 | 768.7778 |
| Brittany       | 201314 | 908.6667 |
| Upper Normandy | 200341 | NA       |
| Upper Normandy | 200342 | 0        |
| Upper Normandy | 200343 | 351.1667 |
| Upper Normandy | 200344 | 360.1667 |
| Upper Normandy | 200345 | 1410     |
| Upper Normandy | 200346 | 1375.429 |
| Upper Normandy | 200347 | 2209.086 |
| Upper Normandy | 200348 | 2381.968 |
| Upper Normandy | 200349 | 1044.394 |
| Upper Normandy | 200350 | 1429.988 |
| Upper Normandy | 200351 | 890.7381 |
| Upper Normandy | 200352 | NA       |
| Upper Normandy | 200401 | NA       |
| Upper Normandy | 200402 | NA       |
| Upper Normandy | 200403 | NA       |
| Upper Normandy | 200404 | NA       |
| Upper Normandy | 200405 | NA       |
| Upper Normandy | 200406 | NA       |
| Upper Normandy | 200407 | NA       |
| Upper Normandy | 200408 | NA       |
| Upper Normandy | 200409 | NA       |
| Upper Normandy | 200410 | NA       |
| Upper Normandy | 200411 | NA       |
| Upper Normandy | 200412 | NA       |
| Upper Normandy | 200413 | NA       |
| Upper Normandy | 200414 | NA       |
| Upper Normandy | 200441 | NA       |
| Upper Normandy | 200442 | NA       |
| Upper Normandy | 200443 | NA       |
| Upper Normandy | 200444 | NA       |



|                |        |          |
|----------------|--------|----------|
| Upper Normandy | 200445 | NA       |
| Upper Normandy | 200446 | NA       |
| Upper Normandy | 200447 | NA       |
| Upper Normandy | 200448 | 144.1667 |
| Upper Normandy | 200449 | 141.25   |
| Upper Normandy | 200450 | 141.0833 |
| Upper Normandy | 200451 | 0        |
| Upper Normandy | 200452 | 0        |
| Upper Normandy | 200453 | 235.2778 |
| Upper Normandy | 200501 | 410.6667 |
| Upper Normandy | 200502 | NA       |
| Upper Normandy | 200503 | NA       |
| Upper Normandy | 200504 | NA       |
| Upper Normandy | 200505 | 1328.492 |
| Upper Normandy | 200506 | 1355.032 |
| Upper Normandy | 200507 | 3057.786 |
| Upper Normandy | 200508 | 1293.238 |
| Upper Normandy | 200509 | 1650.276 |
| Upper Normandy | 200510 | 1633.776 |
| Upper Normandy | 200511 | NA       |
| Upper Normandy | 200512 | NA       |
| Upper Normandy | 200513 | NA       |
| Upper Normandy | 200514 | NA       |
| Upper Normandy | 200541 | 0        |
| Upper Normandy | 200542 | 0        |
| Upper Normandy | 200543 | NA       |
| Upper Normandy | 200544 | NA       |
| Upper Normandy | 200545 | NA       |
| Upper Normandy | 200546 | NA       |
| Upper Normandy | 200547 | 0        |
| Upper Normandy | 200548 | 0        |
| Upper Normandy | 200549 | 0        |
| Upper Normandy | 200550 | 0        |
| Upper Normandy | 200551 | 0        |
| Upper Normandy | 200552 | 0        |
| Upper Normandy | 200601 | 388.3333 |
| Upper Normandy | 200602 | NA       |
| Upper Normandy | 200603 | NA       |
| Upper Normandy | 200604 | NA       |
| Upper Normandy | 200605 | 1041.911 |
| Upper Normandy | 200606 | NA       |
| Upper Normandy | 200607 | NA       |
| Upper Normandy | 200608 | NA       |
| Upper Normandy | 200609 | 1444     |
| Upper Normandy | 200610 | 1865.6   |
| Upper Normandy | 200611 | 1423.5   |

|                |        |          |
|----------------|--------|----------|
| Upper Normandy | 200612 | 1884.875 |
| Upper Normandy | 200613 | 1440     |
| Upper Normandy | 200614 | 1604.667 |
| Upper Normandy | 200641 | NA       |
| Upper Normandy | 200642 | 0        |
| Upper Normandy | 200643 | 0        |
| Upper Normandy | 200644 | 0        |
| Upper Normandy | 200645 | 0        |
| Upper Normandy | 200646 | 0        |
| Upper Normandy | 200647 | 0        |
| Upper Normandy | 200648 | 0        |
| Upper Normandy | 200649 | 0        |
| Upper Normandy | 200650 | 0        |
| Upper Normandy | 200651 | NA       |
| Upper Normandy | 200652 | NA       |
| Upper Normandy | 200701 | NA       |
| Upper Normandy | 200702 | 291.3333 |
| Upper Normandy | 200703 | 263.581  |
| Upper Normandy | 200704 | 955.4857 |
| Upper Normandy | 200705 | 773.6349 |
| Upper Normandy | 200706 | 1421.69  |
| Upper Normandy | 200707 | 2465.841 |
| Upper Normandy | 200708 | 1543.524 |
| Upper Normandy | 200709 | 323.1667 |
| Upper Normandy | 200710 | 1094.333 |
| Upper Normandy | 200711 | NA       |
| Upper Normandy | 200712 | NA       |
| Upper Normandy | 200713 | NA       |
| Upper Normandy | 200714 | NA       |
| Upper Normandy | 200741 | NA       |
| Upper Normandy | 200742 | 0        |
| Upper Normandy | 200743 | 0        |
| Upper Normandy | 200744 | 0        |
| Upper Normandy | 200745 | 0        |
| Upper Normandy | 200746 | 0        |
| Upper Normandy | 200747 | 122.5556 |
| Upper Normandy | 200748 | 277.0833 |
| Upper Normandy | 200749 | 414.3611 |
| Upper Normandy | 200750 | 303.3333 |
| Upper Normandy | 200751 | NA       |
| Upper Normandy | 200752 | NA       |
| Upper Normandy | 200801 | NA       |
| Upper Normandy | 200802 | 532.1334 |
| Upper Normandy | 200803 | 660.9166 |
| Upper Normandy | 200804 | 833.4    |
| Upper Normandy | 200805 | 1063.431 |

|                |        |          |
|----------------|--------|----------|
| Upper Normandy | 200806 | 896.3428 |
| Upper Normandy | 200807 | 1346.667 |
| Upper Normandy | 200808 | 539.6667 |
| Upper Normandy | 200809 | 545      |
| Upper Normandy | 200810 | 85.5     |
| Upper Normandy | 200811 | 93.41667 |
| Upper Normandy | 200812 | 441.3333 |
| Upper Normandy | 200813 | 767.5    |
| Upper Normandy | 200814 | 1402.5   |
| Upper Normandy | 200841 | NA       |
| Upper Normandy | 200842 | NA       |
| Upper Normandy | 200843 | NA       |
| Upper Normandy | 200844 | NA       |
| Upper Normandy | 200845 | 0        |
| Upper Normandy | 200846 | 0        |
| Upper Normandy | 200847 | 0        |
| Upper Normandy | 200848 | 0        |
| Upper Normandy | 200849 | 307.4445 |
| Upper Normandy | 200850 | 713.8889 |
| Upper Normandy | 200851 | 1643.889 |
| Upper Normandy | 200852 | 1327.944 |
| Upper Normandy | 200901 | 1881     |
| Upper Normandy | 200902 | 1354.667 |
| Upper Normandy | 200903 | 1093.333 |
| Upper Normandy | 200904 | 1160.956 |
| Upper Normandy | 200905 | 493.5333 |
| Upper Normandy | 200906 | 577.8    |
| Upper Normandy | 200907 | 241.8333 |
| Upper Normandy | 200908 | 325.25   |
| Upper Normandy | 200909 | 91.66667 |
| Upper Normandy | 200910 | 125.8333 |
| Upper Normandy | 200911 | 0        |
| Upper Normandy | 200912 | NA       |
| Upper Normandy | 200913 | NA       |
| Upper Normandy | 200914 | NA       |
| Upper Normandy | 201041 | NA       |
| Upper Normandy | 201042 | NA       |
| Upper Normandy | 201043 | NA       |
| Upper Normandy | 201044 | NA       |
| Upper Normandy | 201045 | NA       |
| Upper Normandy | 201046 | NA       |
| Upper Normandy | 201047 | 187.875  |
| Upper Normandy | 201048 | 726.375  |
| Upper Normandy | 201049 | 1281.369 |
| Upper Normandy | 201050 | 2112.232 |
| Upper Normandy | 201051 | 1688.036 |

|                |        |          |
|----------------|--------|----------|
| Upper Normandy | 201052 | 1978.38  |
| Upper Normandy | 201101 | 1288.889 |
| Upper Normandy | 201102 | 957      |
| Upper Normandy | 201103 | 985.0769 |
| Upper Normandy | 201104 | 1436.688 |
| Upper Normandy | 201105 | 1120.144 |
| Upper Normandy | 201106 | 1204.8   |
| Upper Normandy | 201107 | 799.5    |
| Upper Normandy | 201108 | NA       |
| Upper Normandy | 201109 | NA       |
| Upper Normandy | 201110 | NA       |
| Upper Normandy | 201111 | NA       |
| Upper Normandy | 201112 | NA       |
| Upper Normandy | 201113 | NA       |
| Upper Normandy | 201114 | NA       |
| Upper Normandy | 201141 | NA       |
| Upper Normandy | 201142 | NA       |
| Upper Normandy | 201143 | NA       |
| Upper Normandy | 201144 | NA       |
| Upper Normandy | 201145 | 0        |
| Upper Normandy | 201146 | NA       |
| Upper Normandy | 201147 | NA       |
| Upper Normandy | 201148 | NA       |
| Upper Normandy | 201149 | 0        |
| Upper Normandy | 201150 | 0        |
| Upper Normandy | 201151 | NA       |
| Upper Normandy | 201152 | NA       |
| Upper Normandy | 201201 | NA       |
| Upper Normandy | 201202 | 491.2619 |
| Upper Normandy | 201203 | 1065.278 |
| Upper Normandy | 201204 | 294.2857 |
| Upper Normandy | 201205 | 601.2857 |
| Upper Normandy | 201206 | 827.0371 |
| Upper Normandy | 201207 | 1310.296 |
| Upper Normandy | 201208 | 913.5519 |
| Upper Normandy | 201209 | 1899.781 |
| Upper Normandy | 201210 | 1514.667 |
| Upper Normandy | 201211 | 1096.744 |
| Upper Normandy | 201212 | 747.5111 |
| Upper Normandy | 201213 | 643.3334 |
| Upper Normandy | 201214 | NA       |
| Upper Normandy | 201241 | 0        |
| Upper Normandy | 201242 | 0        |
| Upper Normandy | 201243 | 0        |
| Upper Normandy | 201244 | 0        |
| Upper Normandy | 201245 | 0        |

|                |        |          |
|----------------|--------|----------|
| Upper Normandy | 201246 | 154.3333 |
| Upper Normandy | 201247 | 257.1667 |
| Upper Normandy | 201248 | 340.9    |
| Upper Normandy | 201249 | 246.3    |
| Upper Normandy | 201250 | 598.1833 |
| Upper Normandy | 201251 | 1224.417 |
| Upper Normandy | 201252 | 630.8    |
| Upper Normandy | 201301 | 901.1084 |
| Upper Normandy | 201302 | 690.15   |
| Upper Normandy | 201303 | 877.5001 |
| Upper Normandy | 201304 | 1608.841 |
| Upper Normandy | 201305 | 1486.513 |
| Upper Normandy | 201306 | 2099.454 |
| Upper Normandy | 201307 | 2281.196 |
| Upper Normandy | 201308 | 1819.465 |
| Upper Normandy | 201309 | 1078.567 |
| Upper Normandy | 201310 | 886.0555 |
| Upper Normandy | 201311 | 420.2778 |
| Upper Normandy | 201312 | 595.1865 |
| Upper Normandy | 201313 | 566.4603 |
| Upper Normandy | 201314 | 316.9524 |
| Ile-de-France  | 200341 | 216.2222 |
| Ile-de-France  | 200342 | 294.9207 |
| Ile-de-France  | 200343 | 336.9841 |
| Ile-de-France  | 200344 | 227.7262 |
| Ile-de-France  | 200345 | 509.0808 |
| Ile-de-France  | 200346 | 841.2904 |
| Ile-de-France  | 200347 | 1197.384 |
| Ile-de-France  | 200348 | 1733.485 |
| Ile-de-France  | 200349 | 2131.369 |
| Ile-de-France  | 200350 | 1917.6   |
| Ile-de-France  | 200351 | 1725.224 |
| Ile-de-France  | 200352 | 1248.682 |
| Ile-de-France  | 200401 | 456.7766 |
| Ile-de-France  | 200402 | 641.6826 |
| Ile-de-France  | 200403 | 236.6825 |
| Ile-de-France  | 200404 | 95.72222 |
| Ile-de-France  | 200405 | 262      |
| Ile-de-France  | 200406 | 309      |
| Ile-de-France  | 200407 | 311.5    |
| Ile-de-France  | 200408 | 47.26667 |
| Ile-de-France  | 200409 | 0        |
| Ile-de-France  | 200410 | 0        |
| Ile-de-France  | 200411 | 92       |
| Ile-de-France  | 200412 | 282.5    |
| Ile-de-France  | 200413 | 301.8333 |

|               |        |          |
|---------------|--------|----------|
| Ile-de-France | 200414 | 550      |
| Ile-de-France | 200441 | 24.68116 |
| Ile-de-France | 200442 | 26.71015 |
| Ile-de-France | 200443 | 24.30435 |
| Ile-de-France | 200444 | 0        |
| Ile-de-France | 200445 | 0        |
| Ile-de-France | 200446 | 0        |
| Ile-de-France | 200447 | 0        |
| Ile-de-France | 200448 | 165.3333 |
| Ile-de-France | 200449 | 219.1111 |
| Ile-de-France | 200450 | 376.2766 |
| Ile-de-France | 200451 | 347.9    |
| Ile-de-France | 200452 | 594.55   |
| Ile-de-France | 200453 | 862.0963 |
| Ile-de-France | 200501 | 773.0185 |
| Ile-de-France | 200502 | 905.1989 |
| Ile-de-France | 200503 | 902.5228 |
| Ile-de-France | 200504 | 1538.768 |
| Ile-de-France | 200505 | 2227.161 |
| Ile-de-France | 200506 | 2411.598 |
| Ile-de-France | 200507 | 1894.977 |
| Ile-de-France | 200508 | 945.0952 |
| Ile-de-France | 200509 | 851.7124 |
| Ile-de-France | 200510 | 683.5465 |
| Ile-de-France | 200511 | 810.3667 |
| Ile-de-France | 200512 | 723.1222 |
| Ile-de-France | 200513 | 585.4167 |
| Ile-de-France | 200514 | 570.3334 |
| Ile-de-France | 200541 | 0        |
| Ile-de-France | 200542 | 0        |
| Ile-de-France | 200543 | 0        |
| Ile-de-France | 200544 | 0        |
| Ile-de-France | 200545 | 0        |
| Ile-de-France | 200546 | 0        |
| Ile-de-France | 200547 | 0        |
| Ile-de-France | 200548 | 0        |
| Ile-de-France | 200549 | 61.84849 |
| Ile-de-France | 200550 | 129.9314 |
| Ile-de-France | 200551 | 147.7177 |
| Ile-de-France | 200552 | 226.9123 |
| Ile-de-France | 200601 | 171.3143 |
| Ile-de-France | 200602 | 416      |
| Ile-de-France | 200603 | 608.6053 |
| Ile-de-France | 200604 | 1042.137 |
| Ile-de-France | 200605 | 1054.124 |
| Ile-de-France | 200606 | 829.7219 |

|               |        |          |
|---------------|--------|----------|
| Ile-de-France | 200607 | 958.2369 |
| Ile-de-France | 200608 | 745.5588 |
| Ile-de-France | 200609 | 953.2543 |
| Ile-de-France | 200610 | 894.6581 |
| Ile-de-France | 200611 | 786.2807 |
| Ile-de-France | 200612 | 373.4226 |
| Ile-de-France | 200613 | 250.1367 |
| Ile-de-France | 200614 | 64.33334 |
| Ile-de-France | 200641 | 0        |
| Ile-de-France | 200642 | 139.8333 |
| Ile-de-France | 200643 | 148.75   |
| Ile-de-France | 200644 | 126.75   |
| Ile-de-France | 200645 | 0        |
| Ile-de-France | 200646 | 0        |
| Ile-de-France | 200647 | 53.06061 |
| Ile-de-France | 200648 | 130.1212 |
| Ile-de-France | 200649 | 350.1273 |
| Ile-de-France | 200650 | 398.4717 |
| Ile-de-France | 200651 | 617.4423 |
| Ile-de-France | 200652 | 830.517  |
| Ile-de-France | 200701 | 647.0128 |
| Ile-de-France | 200702 | 464.8747 |
| Ile-de-France | 200703 | 392.3181 |
| Ile-de-France | 200704 | 516.7917 |
| Ile-de-France | 200705 | 652.3799 |
| Ile-de-France | 200706 | 680.6989 |
| Ile-de-France | 200707 | 774.1133 |
| Ile-de-France | 200708 | 404.3464 |
| Ile-de-France | 200709 | 236.4927 |
| Ile-de-France | 200710 | 143.3394 |
| Ile-de-France | 200711 | 105.9487 |
| Ile-de-France | 200712 | 133.5385 |
| Ile-de-France | 200713 | 0        |
| Ile-de-France | 200714 | NA       |
| Ile-de-France | 200741 | 0        |
| Ile-de-France | 200742 | 83       |
| Ile-de-France | 200743 | 204.6667 |
| Ile-de-France | 200744 | 143.3333 |
| Ile-de-France | 200745 | 117.9444 |
| Ile-de-France | 200746 | 45.88657 |
| Ile-de-France | 200747 | 60.5544  |
| Ile-de-France | 200748 | 45.37423 |
| Ile-de-France | 200749 | 146.5337 |
| Ile-de-France | 200750 | 309.6675 |
| Ile-de-France | 200751 | 477.673  |
| Ile-de-France | 200752 | 723.2678 |

|               |        |          |
|---------------|--------|----------|
| Ile-de-France | 200801 | 803.8884 |
| Ile-de-France | 200802 | 987.1364 |
| Ile-de-France | 200803 | 970.4973 |
| Ile-de-France | 200804 | 733.7343 |
| Ile-de-France | 200805 | 681.4589 |
| Ile-de-France | 200806 | 835.1957 |
| Ile-de-France | 200807 | 879.5309 |
| Ile-de-France | 200808 | 889.4689 |
| Ile-de-France | 200809 | 723.9927 |
| Ile-de-France | 200810 | 460.8864 |
| Ile-de-France | 200811 | 419.1752 |
| Ile-de-France | 200812 | 300.1514 |
| Ile-de-France | 200813 | 467.7249 |
| Ile-de-France | 200814 | 468.652  |
| Ile-de-France | 200841 | 35.24242 |
| Ile-de-France | 200842 | 72.02139 |
| Ile-de-France | 200843 | 134.3642 |
| Ile-de-France | 200844 | 151.1363 |
| Ile-de-France | 200845 | 177.0831 |
| Ile-de-France | 200846 | 132.4279 |
| Ile-de-France | 200847 | 195.6755 |
| Ile-de-France | 200848 | 326.1985 |
| Ile-de-France | 200849 | 532.8627 |
| Ile-de-France | 200850 | 897.0045 |
| Ile-de-France | 200851 | 1246.979 |
| Ile-de-France | 200852 | 1622.063 |
| Ile-de-France | 200901 | 1047.392 |
| Ile-de-France | 200902 | 1070.196 |
| Ile-de-France | 200903 | 1008.724 |
| Ile-de-France | 200904 | 1127.708 |
| Ile-de-France | 200905 | 670.7303 |
| Ile-de-France | 200906 | 513.4354 |
| Ile-de-France | 200907 | 396.0959 |
| Ile-de-France | 200908 | 283.2767 |
| Ile-de-France | 200909 | 344.0171 |
| Ile-de-France | 200910 | 247.4763 |
| Ile-de-France | 200911 | 331.0101 |
| Ile-de-France | 200912 | 383.5303 |
| Ile-de-France | 200913 | 373.6111 |
| Ile-de-France | 200914 | 360.9127 |
| Ile-de-France | 201041 | 0        |
| Ile-de-France | 201042 | 29.54546 |
| Ile-de-France | 201043 | 113.8182 |
| Ile-de-France | 201044 | 144.5455 |
| Ile-de-France | 201045 | 170.2121 |
| Ile-de-France | 201046 | 353.096  |



|               |        |          |
|---------------|--------|----------|
| Ile-de-France | 201047 | 456.1218 |
| Ile-de-France | 201048 | 748.5945 |
| Ile-de-France | 201049 | 1123.845 |
| Ile-de-France | 201050 | 1329.774 |
| Ile-de-France | 201051 | 1570.722 |
| Ile-de-France | 201052 | 1172.792 |
| Ile-de-France | 201101 | 1178.144 |
| Ile-de-France | 201102 | 1028.211 |
| Ile-de-France | 201103 | 947.3621 |
| Ile-de-France | 201104 | 697.3497 |
| Ile-de-France | 201105 | 715.2183 |
| Ile-de-France | 201106 | 534.051  |
| Ile-de-France | 201107 | 305.0985 |
| Ile-de-France | 201108 | 217.3224 |
| Ile-de-France | 201109 | 107.9141 |
| Ile-de-France | 201110 | 232.5933 |
| Ile-de-France | 201111 | 233.6074 |
| Ile-de-France | 201112 | 656.2592 |
| Ile-de-France | 201113 | 398.6111 |
| Ile-de-France | 201114 | 427.1111 |
| Ile-de-France | 201141 | 0        |
| Ile-de-France | 201142 | 0        |
| Ile-de-France | 201143 | 0        |
| Ile-de-France | 201144 | 63.13334 |
| Ile-de-France | 201145 | 91.73334 |
| Ile-de-France | 201146 | 118.7556 |
| Ile-de-France | 201147 | 60.65359 |
| Ile-de-France | 201148 | 87.70588 |
| Ile-de-France | 201149 | 166.7177 |
| Ile-de-France | 201150 | 290.8745 |
| Ile-de-France | 201151 | 289.7844 |
| Ile-de-France | 201152 | 220.1212 |
| Ile-de-France | 201201 | 188.0512 |
| Ile-de-France | 201202 | 265.463  |
| Ile-de-France | 201203 | 423.1579 |
| Ile-de-France | 201204 | 510.5116 |
| Ile-de-France | 201205 | 592.0504 |
| Ile-de-France | 201206 | 939.9319 |
| Ile-de-France | 201207 | 1387.616 |
| Ile-de-France | 201208 | 1433.846 |
| Ile-de-France | 201209 | 775.5511 |
| Ile-de-France | 201210 | 633.3172 |
| Ile-de-France | 201211 | 454.2127 |
| Ile-de-France | 201212 | 432.7646 |
| Ile-de-France | 201213 | 361.3333 |
| Ile-de-France | 201214 | 388.212  |

|               |        |          |
|---------------|--------|----------|
| Ile-de-France | 201241 | 0        |
| Ile-de-France | 201242 | 0        |
| Ile-de-France | 201243 | 102.6667 |
| Ile-de-France | 201244 | 218.8485 |
| Ile-de-France | 201245 | 266.0682 |
| Ile-de-France | 201246 | 210.9048 |
| Ile-de-France | 201247 | 244.1111 |
| Ile-de-France | 201248 | 422.9023 |
| Ile-de-France | 201249 | 758.5226 |
| Ile-de-France | 201250 | 1009.689 |
| Ile-de-France | 201251 | 1311.708 |
| Ile-de-France | 201252 | 1045.375 |
| Ile-de-France | 201301 | 852.0167 |
| Ile-de-France | 201302 | 1138.083 |
| Ile-de-France | 201303 | 1052.278 |
| Ile-de-France | 201304 | 1690.673 |
| Ile-de-France | 201305 | 1860.746 |
| Ile-de-France | 201306 | 1764.92  |
| Ile-de-France | 201307 | 1348.7   |
| Ile-de-France | 201308 | 1393.063 |
| Ile-de-France | 201309 | 1117.894 |
| Ile-de-France | 201310 | 773.5632 |
| Ile-de-France | 201311 | 519.5555 |
| Ile-de-France | 201312 | 406.3333 |
| Ile-de-France | 201313 | 429.1302 |
| Ile-de-France | 201314 | 335.7905 |
| Lorraine      | 200341 | 82.90476 |
| Lorraine      | 200342 | 91.76191 |
| Lorraine      | 200343 | 81.85715 |
| Lorraine      | 200344 | 71.09524 |
| Lorraine      | 200345 | 159.0857 |
| Lorraine      | 200346 | 325.7072 |
| Lorraine      | 200347 | 662.7349 |
| Lorraine      | 200348 | 1075.922 |
| Lorraine      | 200349 | 1549.898 |
| Lorraine      | 200350 | 1850.201 |
| Lorraine      | 200351 | 1942.163 |
| Lorraine      | 200352 | 1423.709 |
| Lorraine      | 200401 | 1752.743 |
| Lorraine      | 200402 | 770.4667 |
| Lorraine      | 200403 | 621.3334 |
| Lorraine      | 200404 | 82.04762 |
| Lorraine      | 200405 | 83.80952 |
| Lorraine      | 200406 | NA       |
| Lorraine      | 200407 | NA       |
| Lorraine      | 200408 | NA       |

|          |        |          |
|----------|--------|----------|
| Lorraine | 200409 | NA       |
| Lorraine | 200410 | 0        |
| Lorraine | 200411 | NA       |
| Lorraine | 200412 | NA       |
| Lorraine | 200413 | NA       |
| Lorraine | 200414 | 0        |
| Lorraine | 200441 | 0        |
| Lorraine | 200442 | 0        |
| Lorraine | 200443 | 0        |
| Lorraine | 200444 | 0        |
| Lorraine | 200445 | 0        |
| Lorraine | 200446 | 0        |
| Lorraine | 200447 | 0        |
| Lorraine | 200448 | 173.5556 |
| Lorraine | 200449 | 203.5556 |
| Lorraine | 200450 | 420.3333 |
| Lorraine | 200451 | 189.0476 |
| Lorraine | 200452 | 144.5714 |
| Lorraine | 200453 | 0        |
| Lorraine | 200501 | 350.8    |
| Lorraine | 200502 | 542.5455 |
| Lorraine | 200503 | 642.869  |
| Lorraine | 200504 | 777.8775 |
| Lorraine | 200505 | 1327.852 |
| Lorraine | 200506 | 2091.061 |
| Lorraine | 200507 | 1762.584 |
| Lorraine | 200508 | 1326.394 |
| Lorraine | 200509 | 703.1111 |
| Lorraine | 200510 | 1030.5   |
| Lorraine | 200511 | 645      |
| Lorraine | 200512 | 432.5139 |
| Lorraine | 200513 | NA       |
| Lorraine | 200514 | NA       |
| Lorraine | 200541 | 0        |
| Lorraine | 200542 | 0        |
| Lorraine | 200543 | 0        |
| Lorraine | 200544 | 0        |
| Lorraine | 200545 | 0        |
| Lorraine | 200546 | 0        |
| Lorraine | 200547 | 0        |
| Lorraine | 200548 | 0        |
| Lorraine | 200549 | 0        |
| Lorraine | 200550 | 0        |
| Lorraine | 200551 | 0        |
| Lorraine | 200552 | 0        |
| Lorraine | 200601 | 0        |

|          |        |          |
|----------|--------|----------|
| Lorraine | 200602 | 135.5833 |
| Lorraine | 200603 | 219.6833 |
| Lorraine | 200604 | 562.6111 |
| Lorraine | 200605 | 558.494  |
| Lorraine | 200606 | 1004.672 |
| Lorraine | 200607 | 932.9545 |
| Lorraine | 200608 | 495.7273 |
| Lorraine | 200609 | 664.4697 |
| Lorraine | 200610 | 253.25   |
| Lorraine | 200611 | 278.25   |
| Lorraine | 200612 | 78.26667 |
| Lorraine | 200613 | 93.53334 |
| Lorraine | 200614 | NA       |
| Lorraine | 200641 | 0        |
| Lorraine | 200642 | 0        |
| Lorraine | 200643 | 0        |
| Lorraine | 200644 | 0        |
| Lorraine | 200645 | 0        |
| Lorraine | 200646 | 0        |
| Lorraine | 200647 | 0        |
| Lorraine | 200648 | 0        |
| Lorraine | 200649 | 0        |
| Lorraine | 200650 | 0        |
| Lorraine | 200651 | 0        |
| Lorraine | 200652 | 0        |
| Lorraine | 200701 | 150.1818 |
| Lorraine | 200702 | 247.4546 |
| Lorraine | 200703 | 343.1516 |
| Lorraine | 200704 | 445.9813 |
| Lorraine | 200705 | 846.5028 |
| Lorraine | 200706 | 1223.408 |
| Lorraine | 200707 | 2035.872 |
| Lorraine | 200708 | 711.6889 |
| Lorraine | 200709 | 618.9555 |
| Lorraine | 200710 | 763.6333 |
| Lorraine | 200711 | 515.25   |
| Lorraine | 200712 | NA       |
| Lorraine | 200713 | NA       |
| Lorraine | 200714 | NA       |
| Lorraine | 200741 | 0        |
| Lorraine | 200742 | 0        |
| Lorraine | 200743 | 0        |
| Lorraine | 200744 | 0        |
| Lorraine | 200745 | 92.13334 |
| Lorraine | 200746 | 101.6667 |
| Lorraine | 200747 | 201.5407 |

|          |        |          |
|----------|--------|----------|
| Lorraine | 200748 | 288.6592 |
| Lorraine | 200749 | 253.3333 |
| Lorraine | 200750 | 308.5744 |
| Lorraine | 200751 | 318.9103 |
| Lorraine | 200752 | 633.25   |
| Lorraine | 200801 | 700.8571 |
| Lorraine | 200802 | 841.6905 |
| Lorraine | 200803 | 813.4095 |
| Lorraine | 200804 | 972.0389 |
| Lorraine | 200805 | 879.8778 |
| Lorraine | 200806 | 761.1686 |
| Lorraine | 200807 | 834.254  |
| Lorraine | 200808 | 837.2    |
| Lorraine | 200809 | 1204     |
| Lorraine | 200810 | 951.5852 |
| Lorraine | 200811 | 1204     |
| Lorraine | 200812 | 638.8889 |
| Lorraine | 200813 | 220.3333 |
| Lorraine | 200814 | 93.33334 |
| Lorraine | 200841 | NA       |
| Lorraine | 200842 | 119      |
| Lorraine | 200843 | 89.91667 |
| Lorraine | 200844 | 88.41667 |
| Lorraine | 200845 | 0        |
| Lorraine | 200846 | 0        |
| Lorraine | 200847 | 0        |
| Lorraine | 200848 | 0        |
| Lorraine | 200849 | 103.5385 |
| Lorraine | 200850 | 318.3419 |
| Lorraine | 200851 | 699.9385 |
| Lorraine | 200852 | 796.1038 |
| Lorraine | 200901 | 1017.058 |
| Lorraine | 200902 | 1117.154 |
| Lorraine | 200903 | 1181.738 |
| Lorraine | 200904 | 1350.525 |
| Lorraine | 200905 | 964.4838 |
| Lorraine | 200906 | 807.8271 |
| Lorraine | 200907 | 497      |
| Lorraine | 200908 | 446.9333 |
| Lorraine | 200909 | 193.5556 |
| Lorraine | 200910 | 393.5555 |
| Lorraine | 200911 | 252.5333 |
| Lorraine | 200912 | 315.7333 |
| Lorraine | 200913 | 0        |
| Lorraine | 200914 | NA       |
| Lorraine | 201041 | 0        |

|          |        |          |
|----------|--------|----------|
| Lorraine | 201042 | 0        |
| Lorraine | 201043 | 0        |
| Lorraine | 201044 | 0        |
| Lorraine | 201045 | 0        |
| Lorraine | 201046 | 0        |
| Lorraine | 201047 | 55.76191 |
| Lorraine | 201048 | 182.4286 |
| Lorraine | 201049 | 209.037  |
| Lorraine | 201050 | 199.3386 |
| Lorraine | 201051 | 217.3333 |
| Lorraine | 201052 | 278.3333 |
| Lorraine | 201101 | 584.5609 |
| Lorraine | 201102 | 1054.975 |
| Lorraine | 201103 | 1296.597 |
| Lorraine | 201104 | 1361.001 |
| Lorraine | 201105 | 1687.692 |
| Lorraine | 201106 | 1553.114 |
| Lorraine | 201107 | 1178.204 |
| Lorraine | 201108 | 737.4896 |
| Lorraine | 201109 | 731.6    |
| Lorraine | 201110 | 354.6    |
| Lorraine | 201111 | 225.5556 |
| Lorraine | 201112 | 78.88889 |
| Lorraine | 201113 | 117      |
| Lorraine | 201114 | 281      |
| Lorraine | 201141 | 0        |
| Lorraine | 201142 | 0        |
| Lorraine | 201143 | 0        |
| Lorraine | 201144 | 0        |
| Lorraine | 201145 | 0        |
| Lorraine | 201146 | NA       |
| Lorraine | 201147 | NA       |
| Lorraine | 201148 | NA       |
| Lorraine | 201149 | 144.3556 |
| Lorraine | 201150 | 468.6889 |
| Lorraine | 201151 | 292.0222 |
| Lorraine | 201152 | 220.6667 |
| Lorraine | 201201 | 36.27273 |
| Lorraine | 201202 | 82.60606 |
| Lorraine | 201203 | 157.2511 |
| Lorraine | 201204 | 304.6753 |
| Lorraine | 201205 | 468.3117 |
| Lorraine | 201206 | 830.631  |
| Lorraine | 201207 | 976.5796 |
| Lorraine | 201208 | 1196.604 |
| Lorraine | 201209 | 881.899  |

|                    |        |          |
|--------------------|--------|----------|
| Lorraine           | 201210 | 788.5691 |
| Lorraine           | 201211 | 591.7046 |
| Lorraine           | 201212 | 449.9659 |
| Lorraine           | 201213 | 563.6591 |
| Lorraine           | 201214 | 619.7222 |
| Lorraine           | 201241 | 0        |
| Lorraine           | 201242 | 0        |
| Lorraine           | 201243 | 0        |
| Lorraine           | 201244 | 0        |
| Lorraine           | 201245 | 0        |
| Lorraine           | 201246 | 0        |
| Lorraine           | 201247 | 0        |
| Lorraine           | 201248 | 101.3571 |
| Lorraine           | 201249 | 265.8333 |
| Lorraine           | 201250 | 462.2167 |
| Lorraine           | 201251 | 563.5757 |
| Lorraine           | 201252 | 1101.148 |
| Lorraine           | 201301 | 935.5403 |
| Lorraine           | 201302 | 960.209  |
| Lorraine           | 201303 | 987.2001 |
| Lorraine           | 201304 | 1427.605 |
| Lorraine           | 201305 | 2009.724 |
| Lorraine           | 201306 | 1905.726 |
| Lorraine           | 201307 | 1801.879 |
| Lorraine           | 201308 | 1579.08  |
| Lorraine           | 201309 | 1254.684 |
| Lorraine           | 201310 | 734.0353 |
| Lorraine           | 201311 | 430.8384 |
| Lorraine           | 201312 | 218.6182 |
| Lorraine           | 201313 | 152.4935 |
| Lorraine           | 201314 | 150.1676 |
| Nord-Pas-de-Calais | 200341 | NA       |
| Nord-Pas-de-Calais | 200342 | NA       |
| Nord-Pas-de-Calais | 200343 | 824.1085 |
| Nord-Pas-de-Calais | 200344 | 1338.949 |
| Nord-Pas-de-Calais | 200345 | 1069.667 |
| Nord-Pas-de-Calais | 200346 | 1071.967 |
| Nord-Pas-de-Calais | 200347 | 1712.481 |
| Nord-Pas-de-Calais | 200348 | 1246.543 |
| Nord-Pas-de-Calais | 200349 | 1021.131 |
| Nord-Pas-de-Calais | 200350 | 1334.464 |
| Nord-Pas-de-Calais | 200351 | 869.181  |
| Nord-Pas-de-Calais | 200352 | 388.4    |
| Nord-Pas-de-Calais | 200401 | 0        |
| Nord-Pas-de-Calais | 200402 | 0        |
| Nord-Pas-de-Calais | 200403 | 0        |

|                    |        |          |
|--------------------|--------|----------|
| Nord-Pas-de-Calais | 200404 | 0        |
| Nord-Pas-de-Calais | 200405 | NA       |
| Nord-Pas-de-Calais | 200406 | NA       |
| Nord-Pas-de-Calais | 200407 | NA       |
| Nord-Pas-de-Calais | 200408 | NA       |
| Nord-Pas-de-Calais | 200409 | NA       |
| Nord-Pas-de-Calais | 200410 | NA       |
| Nord-Pas-de-Calais | 200411 | NA       |
| Nord-Pas-de-Calais | 200412 | NA       |
| Nord-Pas-de-Calais | 200413 | NA       |
| Nord-Pas-de-Calais | 200414 | NA       |
| Nord-Pas-de-Calais | 200441 | NA       |
| Nord-Pas-de-Calais | 200442 | NA       |
| Nord-Pas-de-Calais | 200443 | NA       |
| Nord-Pas-de-Calais | 200444 | NA       |
| Nord-Pas-de-Calais | 200445 | NA       |
| Nord-Pas-de-Calais | 200446 | NA       |
| Nord-Pas-de-Calais | 200447 | NA       |
| Nord-Pas-de-Calais | 200448 | NA       |
| Nord-Pas-de-Calais | 200449 | 294.6667 |
| Nord-Pas-de-Calais | 200450 | 420.6667 |
| Nord-Pas-de-Calais | 200451 | 0        |
| Nord-Pas-de-Calais | 200452 | 0        |
| Nord-Pas-de-Calais | 200453 | 120.75   |
| Nord-Pas-de-Calais | 200501 | 592.1667 |
| Nord-Pas-de-Calais | 200502 | 897.9167 |
| Nord-Pas-de-Calais | 200503 | 1205.729 |
| Nord-Pas-de-Calais | 200504 | NA       |
| Nord-Pas-de-Calais | 200505 | NA       |
| Nord-Pas-de-Calais | 200506 | NA       |
| Nord-Pas-de-Calais | 200507 | NA       |
| Nord-Pas-de-Calais | 200508 | 966.6191 |
| Nord-Pas-de-Calais | 200509 | 1413.5   |
| Nord-Pas-de-Calais | 200510 | 1042.5   |
| Nord-Pas-de-Calais | 200511 | 650      |
| Nord-Pas-de-Calais | 200512 | 0        |
| Nord-Pas-de-Calais | 200513 | 421.1111 |
| Nord-Pas-de-Calais | 200514 | NA       |
| Nord-Pas-de-Calais | 200541 | NA       |
| Nord-Pas-de-Calais | 200542 | 0        |
| Nord-Pas-de-Calais | 200543 | NA       |
| Nord-Pas-de-Calais | 200544 | NA       |
| Nord-Pas-de-Calais | 200545 | NA       |
| Nord-Pas-de-Calais | 200546 | 0        |
| Nord-Pas-de-Calais | 200547 | 0        |
| Nord-Pas-de-Calais | 200548 | 0        |



|                    |        |          |
|--------------------|--------|----------|
| Nord-Pas-de-Calais | 200549 | 0        |
| Nord-Pas-de-Calais | 200550 | 0        |
| Nord-Pas-de-Calais | 200551 | 0        |
| Nord-Pas-de-Calais | 200552 | NA       |
| Nord-Pas-de-Calais | 200601 | NA       |
| Nord-Pas-de-Calais | 200602 | NA       |
| Nord-Pas-de-Calais | 200603 | 340.1667 |
| Nord-Pas-de-Calais | 200604 | 541.8182 |
| Nord-Pas-de-Calais | 200605 | 501.8182 |
| Nord-Pas-de-Calais | 200606 | 530.2303 |
| Nord-Pas-de-Calais | 200607 | 541.8    |
| Nord-Pas-de-Calais | 200608 | 453.4    |
| Nord-Pas-de-Calais | 200609 | 218.6667 |
| Nord-Pas-de-Calais | 200610 | 346.4889 |
| Nord-Pas-de-Calais | 200611 | 648.6111 |
| Nord-Pas-de-Calais | 200612 | 1020.378 |
| Nord-Pas-de-Calais | 200613 | 1229.4   |
| Nord-Pas-de-Calais | 200614 | NA       |
| Nord-Pas-de-Calais | 200641 | NA       |
| Nord-Pas-de-Calais | 200642 | NA       |
| Nord-Pas-de-Calais | 200643 | 239.3333 |
| Nord-Pas-de-Calais | 200644 | 230.3333 |
| Nord-Pas-de-Calais | 200645 | 217.8333 |
| Nord-Pas-de-Calais | 200646 | 0        |
| Nord-Pas-de-Calais | 200647 | 0        |
| Nord-Pas-de-Calais | 200648 | 257.3333 |
| Nord-Pas-de-Calais | 200649 | 576      |
| Nord-Pas-de-Calais | 200650 | 818      |
| Nord-Pas-de-Calais | 200651 | 566.6667 |
| Nord-Pas-de-Calais | 200652 | 503.1    |
| Nord-Pas-de-Calais | 200701 | 274.1259 |
| Nord-Pas-de-Calais | 200702 | 427.0984 |
| Nord-Pas-de-Calais | 200703 | 202.381  |
| Nord-Pas-de-Calais | 200704 | 295.0843 |
| Nord-Pas-de-Calais | 200705 | 510.5641 |
| Nord-Pas-de-Calais | 200706 | 1270.046 |
| Nord-Pas-de-Calais | 200707 | 1376.143 |
| Nord-Pas-de-Calais | 200708 | 1484.698 |
| Nord-Pas-de-Calais | 200709 | 858.3096 |
| Nord-Pas-de-Calais | 200710 | 549.5833 |
| Nord-Pas-de-Calais | 200711 | NA       |
| Nord-Pas-de-Calais | 200712 | NA       |
| Nord-Pas-de-Calais | 200713 | NA       |
| Nord-Pas-de-Calais | 200714 | NA       |
| Nord-Pas-de-Calais | 200741 | NA       |
| Nord-Pas-de-Calais | 200742 | NA       |

|                    |        |          |
|--------------------|--------|----------|
| Nord-Pas-de-Calais | 200743 | NA       |
| Nord-Pas-de-Calais | 200744 | NA       |
| Nord-Pas-de-Calais | 200745 | 0        |
| Nord-Pas-de-Calais | 200746 | 0        |
| Nord-Pas-de-Calais | 200747 | 0        |
| Nord-Pas-de-Calais | 200748 | 0        |
| Nord-Pas-de-Calais | 200749 | 0        |
| Nord-Pas-de-Calais | 200750 | 127.4167 |
| Nord-Pas-de-Calais | 200751 | 350.5833 |
| Nord-Pas-de-Calais | 200752 | 495.9167 |
| Nord-Pas-de-Calais | 200801 | 677.1429 |
| Nord-Pas-de-Calais | 200802 | 587.4762 |
| Nord-Pas-de-Calais | 200803 | 670.0715 |
| Nord-Pas-de-Calais | 200804 | 542.8666 |
| Nord-Pas-de-Calais | 200805 | 732.5555 |
| Nord-Pas-de-Calais | 200806 | 402.4445 |
| Nord-Pas-de-Calais | 200807 | 496.6667 |
| Nord-Pas-de-Calais | 200808 | 0        |
| Nord-Pas-de-Calais | 200809 | 83.66667 |
| Nord-Pas-de-Calais | 200810 | 260.4445 |
| Nord-Pas-de-Calais | 200811 | 562      |
| Nord-Pas-de-Calais | 200812 | 428.6667 |
| Nord-Pas-de-Calais | 200813 | 297.1111 |
| Nord-Pas-de-Calais | 200814 | 0        |
| Nord-Pas-de-Calais | 200841 | 0        |
| Nord-Pas-de-Calais | 200842 | 0        |
| Nord-Pas-de-Calais | 200843 | NA       |
| Nord-Pas-de-Calais | 200844 | NA       |
| Nord-Pas-de-Calais | 200845 | NA       |
| Nord-Pas-de-Calais | 200846 | 0        |
| Nord-Pas-de-Calais | 200847 | 0        |
| Nord-Pas-de-Calais | 200848 | 0        |
| Nord-Pas-de-Calais | 200849 | 148.0833 |
| Nord-Pas-de-Calais | 200850 | 536.5454 |
| Nord-Pas-de-Calais | 200851 | 940.7606 |
| Nord-Pas-de-Calais | 200852 | 739.6182 |
| Nord-Pas-de-Calais | 200901 | 750.7482 |
| Nord-Pas-de-Calais | 200902 | 717.0222 |
| Nord-Pas-de-Calais | 200903 | 1243.988 |
| Nord-Pas-de-Calais | 200904 | 1093.693 |
| Nord-Pas-de-Calais | 200905 | 1163.411 |
| Nord-Pas-de-Calais | 200906 | 1351.952 |
| Nord-Pas-de-Calais | 200907 | 1188.667 |
| Nord-Pas-de-Calais | 200908 | NA       |
| Nord-Pas-de-Calais | 200909 | NA       |
| Nord-Pas-de-Calais | 200910 | NA       |

|                    |        |          |
|--------------------|--------|----------|
| Nord-Pas-de-Calais | 200911 | NA       |
| Nord-Pas-de-Calais | 200912 | NA       |
| Nord-Pas-de-Calais | 200913 | NA       |
| Nord-Pas-de-Calais | 200914 | NA       |
| Nord-Pas-de-Calais | 201041 | 0        |
| Nord-Pas-de-Calais | 201042 | 0        |
| Nord-Pas-de-Calais | 201043 | NA       |
| Nord-Pas-de-Calais | 201044 | NA       |
| Nord-Pas-de-Calais | 201045 | NA       |
| Nord-Pas-de-Calais | 201046 | 100.7619 |
| Nord-Pas-de-Calais | 201047 | 108.2857 |
| Nord-Pas-de-Calais | 201048 | 473.3333 |
| Nord-Pas-de-Calais | 201049 | 707.5079 |
| Nord-Pas-de-Calais | 201050 | 1190.667 |
| Nord-Pas-de-Calais | 201051 | 1274.325 |
| Nord-Pas-de-Calais | 201052 | 1361.349 |
| Nord-Pas-de-Calais | 201101 | 1320.906 |
| Nord-Pas-de-Calais | 201102 | 1251.795 |
| Nord-Pas-de-Calais | 201103 | 902.0941 |
| Nord-Pas-de-Calais | 201104 | 782.9829 |
| Nord-Pas-de-Calais | 201105 | 793.8485 |
| Nord-Pas-de-Calais | 201106 | 1020.855 |
| Nord-Pas-de-Calais | 201107 | 622.6    |
| Nord-Pas-de-Calais | 201108 | 629.8667 |
| Nord-Pas-de-Calais | 201109 | 432      |
| Nord-Pas-de-Calais | 201110 | 0        |
| Nord-Pas-de-Calais | 201111 | NA       |
| Nord-Pas-de-Calais | 201112 | NA       |
| Nord-Pas-de-Calais | 201113 | NA       |
| Nord-Pas-de-Calais | 201114 | NA       |
| Nord-Pas-de-Calais | 201141 | NA       |
| Nord-Pas-de-Calais | 201142 | 0        |
| Nord-Pas-de-Calais | 201143 | 0        |
| Nord-Pas-de-Calais | 201144 | 0        |
| Nord-Pas-de-Calais | 201145 | 0        |
| Nord-Pas-de-Calais | 201146 | 0        |
| Nord-Pas-de-Calais | 201147 | 0        |
| Nord-Pas-de-Calais | 201148 | 0        |
| Nord-Pas-de-Calais | 201149 | NA       |
| Nord-Pas-de-Calais | 201150 | NA       |
| Nord-Pas-de-Calais | 201151 | NA       |
| Nord-Pas-de-Calais | 201152 | 0        |
| Nord-Pas-de-Calais | 201201 | 0        |
| Nord-Pas-de-Calais | 201202 | 0        |
| Nord-Pas-de-Calais | 201203 | 193.0667 |
| Nord-Pas-de-Calais | 201204 | 352      |

|                    |        |          |
|--------------------|--------|----------|
| Nord-Pas-de-Calais | 201205 | 561.4857 |
| Nord-Pas-de-Calais | 201206 | 467.0397 |
| Nord-Pas-de-Calais | 201207 | 993.0184 |
| Nord-Pas-de-Calais | 201208 | 1419.827 |
| Nord-Pas-de-Calais | 201209 | 724.5043 |
| Nord-Pas-de-Calais | 201210 | 812.7778 |
| Nord-Pas-de-Calais | 201211 | 665.1666 |
| Nord-Pas-de-Calais | 201212 | 538.8445 |
| Nord-Pas-de-Calais | 201213 | 371.6    |
| Nord-Pas-de-Calais | 201214 | 185.0667 |
| Nord-Pas-de-Calais | 201241 | NA       |
| Nord-Pas-de-Calais | 201242 | NA       |
| Nord-Pas-de-Calais | 201243 | NA       |
| Nord-Pas-de-Calais | 201244 | NA       |
| Nord-Pas-de-Calais | 201245 | 0        |
| Nord-Pas-de-Calais | 201246 | 0        |
| Nord-Pas-de-Calais | 201247 | 0        |
| Nord-Pas-de-Calais | 201248 | 73.61111 |
| Nord-Pas-de-Calais | 201249 | 243.6667 |
| Nord-Pas-de-Calais | 201250 | 610.8334 |
| Nord-Pas-de-Calais | 201251 | 799.2315 |
| Nord-Pas-de-Calais | 201252 | 975.5926 |
| Nord-Pas-de-Calais | 201301 | 783.5768 |
| Nord-Pas-de-Calais | 201302 | 990.1905 |
| Nord-Pas-de-Calais | 201303 | 767.0688 |
| Nord-Pas-de-Calais | 201304 | 1080.577 |
| Nord-Pas-de-Calais | 201305 | 1245.084 |
| Nord-Pas-de-Calais | 201306 | 1486.566 |
| Nord-Pas-de-Calais | 201307 | 1946.707 |
| Nord-Pas-de-Calais | 201308 | 1640.741 |
| Nord-Pas-de-Calais | 201309 | NA       |
| Nord-Pas-de-Calais | 201310 | NA       |
| Nord-Pas-de-Calais | 201311 | NA       |
| Nord-Pas-de-Calais | 201312 | 435.5556 |
| Nord-Pas-de-Calais | 201313 | 598.6667 |
| Nord-Pas-de-Calais | 201314 | 313.6667 |
| Pays de la Loire   | 200341 | 102.8889 |
| Pays de la Loire   | 200342 | 97.83334 |
| Pays de la Loire   | 200343 | 184.1667 |
| Pays de la Loire   | 200344 | 159.1667 |
| Pays de la Loire   | 200345 | 521.2593 |
| Pays de la Loire   | 200346 | 837.45   |
| Pays de la Loire   | 200347 | 1606.8   |
| Pays de la Loire   | 200348 | 2321.511 |
| Pays de la Loire   | 200349 | 1932.056 |
| Pays de la Loire   | 200350 | 2104     |

|                  |        |          |
|------------------|--------|----------|
| Pays de la Loire | 200351 | NA       |
| Pays de la Loire | 200352 | NA       |
| Pays de la Loire | 200401 | NA       |
| Pays de la Loire | 200402 | 1135     |
| Pays de la Loire | 200403 | 506.6667 |
| Pays de la Loire | 200404 | 226.1111 |
| Pays de la Loire | 200405 | 0        |
| Pays de la Loire | 200406 | 0        |
| Pays de la Loire | 200407 | 0        |
| Pays de la Loire | 200408 | 0        |
| Pays de la Loire | 200409 | 0        |
| Pays de la Loire | 200410 | 0        |
| Pays de la Loire | 200411 | NA       |
| Pays de la Loire | 200412 | NA       |
| Pays de la Loire | 200413 | NA       |
| Pays de la Loire | 200414 | NA       |
| Pays de la Loire | 200441 | NA       |
| Pays de la Loire | 200442 | NA       |
| Pays de la Loire | 200443 | 0        |
| Pays de la Loire | 200444 | 0        |
| Pays de la Loire | 200445 | 0        |
| Pays de la Loire | 200446 | 0        |
| Pays de la Loire | 200447 | 0        |
| Pays de la Loire | 200448 | 0        |
| Pays de la Loire | 200449 | 0        |
| Pays de la Loire | 200450 | 0        |
| Pays de la Loire | 200451 | 234.7778 |
| Pays de la Loire | 200452 | 358.4445 |
| Pays de la Loire | 200453 | 639.0477 |
| Pays de la Loire | 200501 | 550.3969 |
| Pays de la Loire | 200502 | 474.6032 |
| Pays de la Loire | 200503 | 813.3334 |
| Pays de la Loire | 200504 | 1057.778 |
| Pays de la Loire | 200505 | 1435.766 |
| Pays de la Loire | 200506 | 1517.832 |
| Pays de la Loire | 200507 | 1068.221 |
| Pays de la Loire | 200508 | 1253.593 |
| Pays de la Loire | 200509 | 1622.833 |
| Pays de la Loire | 200510 | 2270.53  |
| Pays de la Loire | 200511 | 2119.748 |
| Pays de la Loire | 200512 | 1571.621 |
| Pays de la Loire | 200513 | 538.2222 |
| Pays de la Loire | 200514 | 300.3333 |
| Pays de la Loire | 200541 | NA       |
| Pays de la Loire | 200542 | NA       |
| Pays de la Loire | 200543 | NA       |

|                  |        |          |
|------------------|--------|----------|
| Pays de la Loire | 200544 | 0        |
| Pays de la Loire | 200545 | 0        |
| Pays de la Loire | 200546 | 0        |
| Pays de la Loire | 200547 | 0        |
| Pays de la Loire | 200548 | 0        |
| Pays de la Loire | 200549 | 0        |
| Pays de la Loire | 200550 | 0        |
| Pays de la Loire | 200551 | 0        |
| Pays de la Loire | 200552 | 0        |
| Pays de la Loire | 200601 | 152.75   |
| Pays de la Loire | 200602 | 460.5    |
| Pays de la Loire | 200603 | 567      |
| Pays de la Loire | 200604 | 696.0909 |
| Pays de la Loire | 200605 | 561.5007 |
| Pays de la Loire | 200606 | 1096.585 |
| Pays de la Loire | 200607 | 835.0399 |
| Pays de la Loire | 200608 | 1086.465 |
| Pays de la Loire | 200609 | 640.4667 |
| Pays de la Loire | 200610 | 458.1905 |
| Pays de la Loire | 200611 | 479.7778 |
| Pays de la Loire | 200612 | 811.9048 |
| Pays de la Loire | 200613 | 967.2223 |
| Pays de la Loire | 200614 | 505.9445 |
| Pays de la Loire | 200641 | 0        |
| Pays de la Loire | 200642 | 0        |
| Pays de la Loire | 200643 | 197.5556 |
| Pays de la Loire | 200644 | 190.2222 |
| Pays de la Loire | 200645 | 182.5556 |
| Pays de la Loire | 200646 | 0        |
| Pays de la Loire | 200647 | 128.0667 |
| Pays de la Loire | 200648 | 124.0667 |
| Pays de la Loire | 200649 | 238.7429 |
| Pays de la Loire | 200650 | 161.8442 |
| Pays de la Loire | 200651 | 449.1429 |
| Pays de la Loire | 200652 | 495.6485 |
| Pays de la Loire | 200701 | 637.4222 |
| Pays de la Loire | 200702 | 675.4286 |
| Pays de la Loire | 200703 | 785.8062 |
| Pays de la Loire | 200704 | 1170.861 |
| Pays de la Loire | 200705 | 1638.782 |
| Pays de la Loire | 200706 | 1394.151 |
| Pays de la Loire | 200707 | 771.4662 |
| Pays de la Loire | 200708 | 617.6296 |
| Pays de la Loire | 200709 | 662.787  |
| Pays de la Loire | 200710 | 594.5278 |
| Pays de la Loire | 200711 | 583      |

|                  |        |          |
|------------------|--------|----------|
| Pays de la Loire | 200712 | 349.4445 |
| Pays de la Loire | 200713 | NA       |
| Pays de la Loire | 200714 | NA       |
| Pays de la Loire | 200741 | 0        |
| Pays de la Loire | 200742 | 0        |
| Pays de la Loire | 200743 | 0        |
| Pays de la Loire | 200744 | 0        |
| Pays de la Loire | 200745 | 0        |
| Pays de la Loire | 200746 | 49.25926 |
| Pays de la Loire | 200747 | 68.25926 |
| Pays de la Loire | 200748 | 80.48148 |
| Pays de la Loire | 200749 | 119.7222 |
| Pays de la Loire | 200750 | 128.5    |
| Pays de la Loire | 200751 | 277.1111 |
| Pays de la Loire | 200752 | 204.0694 |
| Pays de la Loire | 200801 | 344.1083 |
| Pays de la Loire | 200802 | 367.6881 |
| Pays de la Loire | 200803 | 607.1143 |
| Pays de la Loire | 200804 | 866.1639 |
| Pays de la Loire | 200805 | 1017.406 |
| Pays de la Loire | 200806 | 1167.188 |
| Pays de la Loire | 200807 | 1245.932 |
| Pays de la Loire | 200808 | 1381.512 |
| Pays de la Loire | 200809 | 878.5    |
| Pays de la Loire | 200810 | 682.2728 |
| Pays de la Loire | 200811 | 502.415  |
| Pays de la Loire | 200812 | 395.125  |
| Pays de la Loire | 200813 | 477      |
| Pays de la Loire | 200814 | 395.5    |
| Pays de la Loire | 200841 | 0        |
| Pays de la Loire | 200842 | 0        |
| Pays de la Loire | 200843 | 0        |
| Pays de la Loire | 200844 | 117      |
| Pays de la Loire | 200845 | 128.6667 |
| Pays de la Loire | 200846 | 160.35   |
| Pays de la Loire | 200847 | 162.2833 |
| Pays de la Loire | 200848 | 261.5555 |
| Pays de la Loire | 200849 | 402.1861 |
| Pays de la Loire | 200850 | 737.4872 |
| Pays de la Loire | 200851 | 898.0865 |
| Pays de la Loire | 200852 | 1196.489 |
| Pays de la Loire | 200901 | 1462.409 |
| Pays de la Loire | 200902 | 2072.442 |
| Pays de la Loire | 200903 | 2426.287 |
| Pays de la Loire | 200904 | 1804.818 |
| Pays de la Loire | 200905 | 1510.677 |

|                  |        |          |
|------------------|--------|----------|
| Pays de la Loire | 200906 | 1209.813 |
| Pays de la Loire | 200907 | 823.3883 |
| Pays de la Loire | 200908 | 620.3901 |
| Pays de la Loire | 200909 | 438.2487 |
| Pays de la Loire | 200910 | 375.873  |
| Pays de la Loire | 200911 | 748.9444 |
| Pays de la Loire | 200912 | 753.5    |
| Pays de la Loire | 200913 | 812      |
| Pays de la Loire | 200914 | 630.4166 |
| Pays de la Loire | 201041 | 0        |
| Pays de la Loire | 201042 | 0        |
| Pays de la Loire | 201043 | 0        |
| Pays de la Loire | 201044 | 194.8333 |
| Pays de la Loire | 201045 | 210.2143 |
| Pays de la Loire | 201046 | 228.2143 |
| Pays de la Loire | 201047 | 188.5368 |
| Pays de la Loire | 201048 | 321.2121 |
| Pays de la Loire | 201049 | 643.8278 |
| Pays de la Loire | 201050 | 978.7377 |
| Pays de la Loire | 201051 | 1033.151 |
| Pays de la Loire | 201052 | 1445.333 |
| Pays de la Loire | 201101 | 1253.252 |
| Pays de la Loire | 201102 | 1203.33  |
| Pays de la Loire | 201103 | 1161.064 |
| Pays de la Loire | 201104 | 1049.271 |
| Pays de la Loire | 201105 | 1302.938 |
| Pays de la Loire | 201106 | 1014.83  |
| Pays de la Loire | 201107 | 734.6178 |
| Pays de la Loire | 201108 | 501.1191 |
| Pays de la Loire | 201109 | 470.1984 |
| Pays de la Loire | 201110 | 340.2333 |
| Pays de la Loire | 201111 | 412.4666 |
| Pays de la Loire | 201112 | 347.3889 |
| Pays de la Loire | 201113 | 266.1111 |
| Pays de la Loire | 201114 | 99       |
| Pays de la Loire | 201141 | 0        |
| Pays de la Loire | 201142 | 0        |
| Pays de la Loire | 201143 | 0        |
| Pays de la Loire | 201144 | 0        |
| Pays de la Loire | 201145 | 0        |
| Pays de la Loire | 201146 | 0        |
| Pays de la Loire | 201147 | 0        |
| Pays de la Loire | 201148 | 0        |
| Pays de la Loire | 201149 | 0        |
| Pays de la Loire | 201150 | 0        |
| Pays de la Loire | 201151 | 774.3334 |



|                  |        |          |
|------------------|--------|----------|
| Pays de la Loire | 201152 | 620      |
| Pays de la Loire | 201201 | 575.6667 |
| Pays de la Loire | 201202 | 0        |
| Pays de la Loire | 201203 | 113.2    |
| Pays de la Loire | 201204 | 187.5429 |
| Pays de la Loire | 201205 | 501.0346 |
| Pays de la Loire | 201206 | 714.8961 |
| Pays de la Loire | 201207 | 1170.703 |
| Pays de la Loire | 201208 | 1111.399 |
| Pays de la Loire | 201209 | 1321.327 |
| Pays de la Loire | 201210 | 1101.611 |
| Pays de la Loire | 201211 | 1262.222 |
| Pays de la Loire | 201212 | 1223.873 |
| Pays de la Loire | 201213 | 1002.75  |
| Pays de la Loire | 201214 | 844.2619 |
| Pays de la Loire | 201241 | NA       |
| Pays de la Loire | 201242 | NA       |
| Pays de la Loire | 201243 | 0        |
| Pays de la Loire | 201244 | 160.2222 |
| Pays de la Loire | 201245 | 203      |
| Pays de la Loire | 201246 | 426.6667 |
| Pays de la Loire | 201247 | 389.1667 |
| Pays de la Loire | 201248 | 733.5    |
| Pays de la Loire | 201249 | 967.4667 |
| Pays de la Loire | 201250 | 1593.533 |
| Pays de la Loire | 201251 | 1740.2   |
| Pays de la Loire | 201252 | 1064     |
| Pays de la Loire | 201301 | 1172.167 |
| Pays de la Loire | 201302 | 1013.389 |
| Pays de la Loire | 201303 | 981.9722 |
| Pays de la Loire | 201304 | 772.9471 |
| Pays de la Loire | 201305 | 1088.2   |
| Pays de la Loire | 201306 | 1736.536 |
| Pays de la Loire | 201307 | 2147.924 |
| Pays de la Loire | 201308 | 2126.05  |
| Pays de la Loire | 201309 | 2324.875 |
| Pays de la Loire | 201310 | 1682.292 |
| Pays de la Loire | 201311 | 911.8889 |
| Pays de la Loire | 201312 | 676.3889 |
| Pays de la Loire | 201313 | 573.2222 |
| Pays de la Loire | 201314 | 500.6667 |
| Picardy          | 200341 | NA       |
| Picardy          | 200342 | NA       |
| Picardy          | 200343 | 1327.143 |
| Picardy          | 200344 | 1363.333 |
| Picardy          | 200345 | 765.7678 |

|         |        |          |
|---------|--------|----------|
| Picardy | 200346 | 967.875  |
| Picardy | 200347 | 2576.293 |
| Picardy | 200348 | 2697.256 |
| Picardy | 200349 | 2919.443 |
| Picardy | 200350 | 1558.462 |
| Picardy | 200351 | 1516.5   |
| Picardy | 200352 | NA       |
| Picardy | 200401 | NA       |
| Picardy | 200402 | NA       |
| Picardy | 200403 | 326.5    |
| Picardy | 200404 | 328.3333 |
| Picardy | 200405 | 0        |
| Picardy | 200406 | NA       |
| Picardy | 200407 | NA       |
| Picardy | 200408 | NA       |
| Picardy | 200409 | NA       |
| Picardy | 200410 | NA       |
| Picardy | 200411 | NA       |
| Picardy | 200412 | NA       |
| Picardy | 200413 | NA       |
| Picardy | 200414 | NA       |
| Picardy | 200441 | NA       |
| Picardy | 200442 | NA       |
| Picardy | 200443 | NA       |
| Picardy | 200444 | NA       |
| Picardy | 200445 | NA       |
| Picardy | 200446 | NA       |
| Picardy | 200447 | NA       |
| Picardy | 200448 | 0        |
| Picardy | 200449 | 0        |
| Picardy | 200450 | 113.9048 |
| Picardy | 200451 | 117.4286 |
| Picardy | 200452 | 273.9524 |
| Picardy | 200453 | 286      |
| Picardy | 200501 | 488.4028 |
| Picardy | 200502 | 523.5555 |
| Picardy | 200503 | 648.0833 |
| Picardy | 200504 | 997.8808 |
| Picardy | 200505 | 1142.797 |
| Picardy | 200506 | 1071.257 |
| Picardy | 200507 | 1325.821 |
| Picardy | 200508 | 1212.722 |
| Picardy | 200509 | 1675.106 |
| Picardy | 200510 | 1426.758 |
| Picardy | 200511 | 1741.994 |
| Picardy | 200512 | 1053.206 |

|         |        |          |
|---------|--------|----------|
| Picardy | 200513 | 1230.556 |
| Picardy | 200514 | NA       |
| Picardy | 200541 | NA       |
| Picardy | 200542 | NA       |
| Picardy | 200543 | NA       |
| Picardy | 200544 | NA       |
| Picardy | 200545 | NA       |
| Picardy | 200546 | NA       |
| Picardy | 200547 | 0        |
| Picardy | 200548 | 119.1905 |
| Picardy | 200549 | 128.7143 |
| Picardy | 200550 | 509.5238 |
| Picardy | 200551 | 305.3333 |
| Picardy | 200552 | 315.3333 |
| Picardy | 200601 | 0        |
| Picardy | 200602 | 503.8333 |
| Picardy | 200603 | 806.077  |
| Picardy | 200604 | 1362.303 |
| Picardy | 200605 | 1529.632 |
| Picardy | 200606 | 1581.04  |
| Picardy | 200607 | 1229.829 |
| Picardy | 200608 | 1254.629 |
| Picardy | 200609 | 589.9683 |
| Picardy | 200610 | 589.4445 |
| Picardy | 200611 | 334.8333 |
| Picardy | 200612 | 815      |
| Picardy | 200613 | 1346.5   |
| Picardy | 200614 | 921      |
| Picardy | 200641 | NA       |
| Picardy | 200642 | NA       |
| Picardy | 200643 | 0        |
| Picardy | 200644 | 0        |
| Picardy | 200645 | 0        |
| Picardy | 200646 | 93.76191 |
| Picardy | 200647 | 97.14286 |
| Picardy | 200648 | 91.57143 |
| Picardy | 200649 | 316.5714 |
| Picardy | 200650 | NA       |
| Picardy | 200651 | NA       |
| Picardy | 200652 | NA       |
| Picardy | 200701 | 753.0556 |
| Picardy | 200702 | 777      |
| Picardy | 200703 | 885.1919 |
| Picardy | 200704 | 1455.606 |
| Picardy | 200705 | 2114.017 |
| Picardy | 200706 | 2248.976 |

|         |        |          |
|---------|--------|----------|
| Picardy | 200707 | 1666.357 |
| Picardy | 200708 | 1188.583 |
| Picardy | 200709 | 662.75   |
| Picardy | 200710 | 618.2222 |
| Picardy | 200711 | 315.5556 |
| Picardy | 200712 | NA       |
| Picardy | 200713 | NA       |
| Picardy | 200714 | NA       |
| Picardy | 200741 | 0        |
| Picardy | 200742 | 0        |
| Picardy | 200743 | 326.6667 |
| Picardy | 200744 | 280.6667 |
| Picardy | 200745 | 269.5    |
| Picardy | 200746 | 64.25926 |
| Picardy | 200747 | 67.44444 |
| Picardy | 200748 | 72.2963  |
| Picardy | 200749 | 77.33334 |
| Picardy | 200750 | 208.8593 |
| Picardy | 200751 | 662.137  |
| Picardy | 200752 | 964.6857 |
| Picardy | 200801 | 880.0063 |
| Picardy | 200802 | 1271.632 |
| Picardy | 200803 | 1654.702 |
| Picardy | 200804 | 1279     |
| Picardy | 200805 | 1231.714 |
| Picardy | 200806 | 989.8022 |
| Picardy | 200807 | 1121.272 |
| Picardy | 200808 | 537.8715 |
| Picardy | 200809 | 229.581  |
| Picardy | 200810 | 279.6095 |
| Picardy | 200811 | 354.2    |
| Picardy | 200812 | 363.8    |
| Picardy | 200813 | 547.5    |
| Picardy | 200814 | 594      |
| Picardy | 200841 | 0        |
| Picardy | 200842 | NA       |
| Picardy | 200843 | NA       |
| Picardy | 200844 | NA       |
| Picardy | 200845 | 0        |
| Picardy | 200846 | NA       |
| Picardy | 200847 | NA       |
| Picardy | 200848 | NA       |
| Picardy | 200849 | 631.7333 |
| Picardy | 200850 | 730.8889 |
| Picardy | 200851 | 1136.889 |
| Picardy | 200852 | 789.6296 |

|         |        |          |
|---------|--------|----------|
| Picardy | 200901 | 138.3545 |
| Picardy | 200902 | 1075.498 |
| Picardy | 200903 | 1440.038 |
| Picardy | 200904 | 1265.429 |
| Picardy | 200905 | 932.8953 |
| Picardy | 200906 | 753.3334 |
| Picardy | 200907 | 378.2    |
| Picardy | 200908 | 491.4    |
| Picardy | 200909 | 296.5714 |
| Picardy | 200910 | 459.746  |
| Picardy | 200911 | 588.3889 |
| Picardy | 200912 | 599.25   |
| Picardy | 200913 | 386.75   |
| Picardy | 200914 | 482.75   |
| Picardy | 201041 | 87.11111 |
| Picardy | 201042 | 88.66666 |
| Picardy | 201043 | 71.66666 |
| Picardy | 201044 | 0        |
| Picardy | 201045 | 0        |
| Picardy | 201046 | 231.3333 |
| Picardy | 201047 | 441      |
| Picardy | 201048 | 1051.755 |
| Picardy | 201049 | 918.0667 |
| Picardy | 201050 | 1240.802 |
| Picardy | 201051 | NA       |
| Picardy | 201052 | NA       |
| Picardy | 201101 | NA       |
| Picardy | 201102 | 1620.5   |
| Picardy | 201103 | 1289.937 |
| Picardy | 201104 | 1121.378 |
| Picardy | 201105 | 855.2889 |
| Picardy | 201106 | 728.3556 |
| Picardy | 201107 | NA       |
| Picardy | 201108 | NA       |
| Picardy | 201109 | NA       |
| Picardy | 201110 | 0        |
| Picardy | 201111 | 0        |
| Picardy | 201112 | NA       |
| Picardy | 201113 | NA       |
| Picardy | 201114 | NA       |
| Picardy | 201141 | 0        |
| Picardy | 201142 | 0        |
| Picardy | 201143 | 0        |
| Picardy | 201144 | 0        |
| Picardy | 201145 | NA       |
| Picardy | 201146 | NA       |

|         |        |          |
|---------|--------|----------|
| Picardy | 201147 | NA       |
| Picardy | 201148 | 0        |
| Picardy | 201149 | 0        |
| Picardy | 201150 | NA       |
| Picardy | 201151 | NA       |
| Picardy | 201152 | NA       |
| Picardy | 201201 | 0        |
| Picardy | 201202 | 0        |
| Picardy | 201203 | 379.2381 |
| Picardy | 201204 | 547.7143 |
| Picardy | 201205 | 917.3207 |
| Picardy | 201206 | 971.4794 |
| Picardy | 201207 | 1399.927 |
| Picardy | 201208 | 1852.191 |
| Picardy | 201209 | 1187.2   |
| Picardy | 201210 | 907.9167 |
| Picardy | 201211 | 353.6945 |
| Picardy | 201212 | 713.3333 |
| Picardy | 201213 | 937.3334 |
| Picardy | 201214 | NA       |
| Picardy | 201241 | NA       |
| Picardy | 201242 | NA       |
| Picardy | 201243 | NA       |
| Picardy | 201244 | NA       |
| Picardy | 201245 | NA       |
| Picardy | 201246 | NA       |
| Picardy | 201247 | NA       |
| Picardy | 201248 | NA       |
| Picardy | 201249 | NA       |
| Picardy | 201250 | 1741.5   |
| Picardy | 201251 | 1686.111 |
| Picardy | 201252 | 1235.528 |
| Picardy | 201301 | 734.4445 |
| Picardy | 201302 | 907.5    |
| Picardy | 201303 | 935.9318 |
| Picardy | 201304 | 1582.943 |
| Picardy | 201305 | 2091.5   |
| Picardy | 201306 | 2280.667 |
| Picardy | 201307 | 2155.4   |
| Picardy | 201308 | 1334.4   |
| Picardy | 201309 | 1300.6   |
| Picardy | 201310 | 1616.3   |
| Picardy | 201311 | 819      |
| Picardy | 201312 | 645.3334 |
| Picardy | 201313 | 767.2778 |
| Picardy | 201314 | 1206.111 |

|                            |        |          |
|----------------------------|--------|----------|
| Provence-Alpes-Cote d'Azur | 200341 | 0        |
| Provence-Alpes-Cote d'Azur | 200342 | 0        |
| Provence-Alpes-Cote d'Azur | 200343 | 0        |
| Provence-Alpes-Cote d'Azur | 200344 | 0        |
| Provence-Alpes-Cote d'Azur | 200345 | 260.4615 |
| Provence-Alpes-Cote d'Azur | 200346 | 714.8205 |
| Provence-Alpes-Cote d'Azur | 200347 | 1007.909 |
| Provence-Alpes-Cote d'Azur | 200348 | 1474.467 |
| Provence-Alpes-Cote d'Azur | 200349 | 1999.829 |
| Provence-Alpes-Cote d'Azur | 200350 | 1651.16  |
| Provence-Alpes-Cote d'Azur | 200351 | 1595.883 |
| Provence-Alpes-Cote d'Azur | 200352 | 363.6508 |
| Provence-Alpes-Cote d'Azur | 200401 | 890.7556 |
| Provence-Alpes-Cote d'Azur | 200402 | 288.9333 |
| Provence-Alpes-Cote d'Azur | 200403 | 260      |
| Provence-Alpes-Cote d'Azur | 200404 | 0        |
| Provence-Alpes-Cote d'Azur | 200405 | 0        |
| Provence-Alpes-Cote d'Azur | 200406 | 0        |
| Provence-Alpes-Cote d'Azur | 200407 | 144.4167 |
| Provence-Alpes-Cote d'Azur | 200408 | 207      |
| Provence-Alpes-Cote d'Azur | 200409 | 213.1667 |
| Provence-Alpes-Cote d'Azur | 200410 | 180      |
| Provence-Alpes-Cote d'Azur | 200411 | 167.3333 |
| Provence-Alpes-Cote d'Azur | 200412 | NA       |
| Provence-Alpes-Cote d'Azur | 200413 | NA       |
| Provence-Alpes-Cote d'Azur | 200414 | NA       |
| Provence-Alpes-Cote d'Azur | 200441 | 0        |
| Provence-Alpes-Cote d'Azur | 200442 | 0        |
| Provence-Alpes-Cote d'Azur | 200443 | 0        |
| Provence-Alpes-Cote d'Azur | 200444 | 0        |
| Provence-Alpes-Cote d'Azur | 200445 | 0        |
| Provence-Alpes-Cote d'Azur | 200446 | 0        |
| Provence-Alpes-Cote d'Azur | 200447 | 0        |
| Provence-Alpes-Cote d'Azur | 200448 | 0        |
| Provence-Alpes-Cote d'Azur | 200449 | 98.4     |
| Provence-Alpes-Cote d'Azur | 200450 | 136.0667 |
| Provence-Alpes-Cote d'Azur | 200451 | 240.6268 |
| Provence-Alpes-Cote d'Azur | 200452 | 384.5732 |
| Provence-Alpes-Cote d'Azur | 200453 | 548.6436 |
| Provence-Alpes-Cote d'Azur | 200501 | 1075.083 |
| Provence-Alpes-Cote d'Azur | 200502 | 1238.273 |
| Provence-Alpes-Cote d'Azur | 200503 | 1631.325 |
| Provence-Alpes-Cote d'Azur | 200504 | 1821.222 |
| Provence-Alpes-Cote d'Azur | 200505 | 2337.183 |
| Provence-Alpes-Cote d'Azur | 200506 | 2169.235 |
| Provence-Alpes-Cote d'Azur | 200507 | 1203.013 |

|                            |        |          |
|----------------------------|--------|----------|
| Provence-Alpes-Cote d'Azur | 200508 | 825.0596 |
| Provence-Alpes-Cote d'Azur | 200509 | 694.508  |
| Provence-Alpes-Cote d'Azur | 200510 | 554.1667 |
| Provence-Alpes-Cote d'Azur | 200511 | 458.25   |
| Provence-Alpes-Cote d'Azur | 200512 | 202.5    |
| Provence-Alpes-Cote d'Azur | 200513 | 107.25   |
| Provence-Alpes-Cote d'Azur | 200514 | 0        |
| Provence-Alpes-Cote d'Azur | 200541 | 0        |
| Provence-Alpes-Cote d'Azur | 200542 | 0        |
| Provence-Alpes-Cote d'Azur | 200543 | 0        |
| Provence-Alpes-Cote d'Azur | 200544 | 0        |
| Provence-Alpes-Cote d'Azur | 200545 | 0        |
| Provence-Alpes-Cote d'Azur | 200546 | 0        |
| Provence-Alpes-Cote d'Azur | 200547 | 0        |
| Provence-Alpes-Cote d'Azur | 200548 | 0        |
| Provence-Alpes-Cote d'Azur | 200549 | 0        |
| Provence-Alpes-Cote d'Azur | 200550 | 0        |
| Provence-Alpes-Cote d'Azur | 200551 | 0        |
| Provence-Alpes-Cote d'Azur | 200552 | 101.9111 |
| Provence-Alpes-Cote d'Azur | 200601 | 147.2496 |
| Provence-Alpes-Cote d'Azur | 200602 | 210.8257 |
| Provence-Alpes-Cote d'Azur | 200603 | 354.2393 |
| Provence-Alpes-Cote d'Azur | 200604 | 471.686  |
| Provence-Alpes-Cote d'Azur | 200605 | 618.5289 |
| Provence-Alpes-Cote d'Azur | 200606 | 557.2675 |
| Provence-Alpes-Cote d'Azur | 200607 | 277.5758 |
| Provence-Alpes-Cote d'Azur | 200608 | 221      |
| Provence-Alpes-Cote d'Azur | 200609 | 343.3571 |
| Provence-Alpes-Cote d'Azur | 200610 | 529.5178 |
| Provence-Alpes-Cote d'Azur | 200611 | 556.6115 |
| Provence-Alpes-Cote d'Azur | 200612 | 810.739  |
| Provence-Alpes-Cote d'Azur | 200613 | 425.9091 |
| Provence-Alpes-Cote d'Azur | 200614 | 213      |
| Provence-Alpes-Cote d'Azur | 200641 | 0        |
| Provence-Alpes-Cote d'Azur | 200642 | 0        |
| Provence-Alpes-Cote d'Azur | 200643 | 0        |
| Provence-Alpes-Cote d'Azur | 200644 | 0        |
| Provence-Alpes-Cote d'Azur | 200645 | 0        |
| Provence-Alpes-Cote d'Azur | 200646 | 0        |
| Provence-Alpes-Cote d'Azur | 200647 | 0        |
| Provence-Alpes-Cote d'Azur | 200648 | 0        |
| Provence-Alpes-Cote d'Azur | 200649 | 0        |
| Provence-Alpes-Cote d'Azur | 200650 | 92.11111 |
| Provence-Alpes-Cote d'Azur | 200651 | 384.2963 |
| Provence-Alpes-Cote d'Azur | 200652 | 680.291  |
| Provence-Alpes-Cote d'Azur | 200701 | 899.2361 |



|                            |        |          |
|----------------------------|--------|----------|
| Provence-Alpes-Cote d'Azur | 200702 | 615.3965 |
| Provence-Alpes-Cote d'Azur | 200703 | 939.9359 |
| Provence-Alpes-Cote d'Azur | 200704 | 1451.91  |
| Provence-Alpes-Cote d'Azur | 200705 | 1759.138 |
| Provence-Alpes-Cote d'Azur | 200706 | 1456.07  |
| Provence-Alpes-Cote d'Azur | 200707 | 1151.018 |
| Provence-Alpes-Cote d'Azur | 200708 | 1118.845 |
| Provence-Alpes-Cote d'Azur | 200709 | 556.4854 |
| Provence-Alpes-Cote d'Azur | 200710 | 144.1111 |
| Provence-Alpes-Cote d'Azur | 200711 | 141.2222 |
| Provence-Alpes-Cote d'Azur | 200712 | 111.3333 |
| Provence-Alpes-Cote d'Azur | 200713 | 150.1111 |
| Provence-Alpes-Cote d'Azur | 200714 | NA       |
| Provence-Alpes-Cote d'Azur | 200741 | 0        |
| Provence-Alpes-Cote d'Azur | 200742 | 0        |
| Provence-Alpes-Cote d'Azur | 200743 | 0        |
| Provence-Alpes-Cote d'Azur | 200744 | 0        |
| Provence-Alpes-Cote d'Azur | 200745 | 0        |
| Provence-Alpes-Cote d'Azur | 200746 | 0        |
| Provence-Alpes-Cote d'Azur | 200747 | 0        |
| Provence-Alpes-Cote d'Azur | 200748 | 71.9     |
| Provence-Alpes-Cote d'Azur | 200749 | 92.56667 |
| Provence-Alpes-Cote d'Azur | 200750 | 234.6606 |
| Provence-Alpes-Cote d'Azur | 200751 | 650.4546 |
| Provence-Alpes-Cote d'Azur | 200752 | 734.3636 |
| Provence-Alpes-Cote d'Azur | 200801 | 953.106  |
| Provence-Alpes-Cote d'Azur | 200802 | 794.3523 |
| Provence-Alpes-Cote d'Azur | 200803 | 807.5828 |
| Provence-Alpes-Cote d'Azur | 200804 | 1023.706 |
| Provence-Alpes-Cote d'Azur | 200805 | 1152.17  |
| Provence-Alpes-Cote d'Azur | 200806 | 818.1103 |
| Provence-Alpes-Cote d'Azur | 200807 | 941.625  |
| Provence-Alpes-Cote d'Azur | 200808 | 649.8149 |
| Provence-Alpes-Cote d'Azur | 200809 | 603      |
| Provence-Alpes-Cote d'Azur | 200810 | 252.1296 |
| Provence-Alpes-Cote d'Azur | 200811 | 222.1944 |
| Provence-Alpes-Cote d'Azur | 200812 | 223.7593 |
| Provence-Alpes-Cote d'Azur | 200813 | 269.4833 |
| Provence-Alpes-Cote d'Azur | 200814 | 214.35   |
| Provence-Alpes-Cote d'Azur | 200841 | 0        |
| Provence-Alpes-Cote d'Azur | 200842 | 0        |
| Provence-Alpes-Cote d'Azur | 200843 | 0        |
| Provence-Alpes-Cote d'Azur | 200844 | 0        |
| Provence-Alpes-Cote d'Azur | 200845 | 0        |
| Provence-Alpes-Cote d'Azur | 200846 | 0        |
| Provence-Alpes-Cote d'Azur | 200847 | 0        |

|                            |        |          |
|----------------------------|--------|----------|
| Provence-Alpes-Cote d'Azur | 200848 | 83.77778 |
| Provence-Alpes-Cote d'Azur | 200849 | 158.9921 |
| Provence-Alpes-Cote d'Azur | 200850 | 351.1455 |
| Provence-Alpes-Cote d'Azur | 200851 | 415.5008 |
| Provence-Alpes-Cote d'Azur | 200852 | 811.9046 |
| Provence-Alpes-Cote d'Azur | 200901 | 1077.308 |
| Provence-Alpes-Cote d'Azur | 200902 | 1114.39  |
| Provence-Alpes-Cote d'Azur | 200903 | 1110.02  |
| Provence-Alpes-Cote d'Azur | 200904 | 1610.78  |
| Provence-Alpes-Cote d'Azur | 200905 | 1090.588 |
| Provence-Alpes-Cote d'Azur | 200906 | 734.8535 |
| Provence-Alpes-Cote d'Azur | 200907 | 463.5509 |
| Provence-Alpes-Cote d'Azur | 200908 | 551.6771 |
| Provence-Alpes-Cote d'Azur | 200909 | 586.9681 |
| Provence-Alpes-Cote d'Azur | 200910 | 348.1077 |
| Provence-Alpes-Cote d'Azur | 200911 | 277.6889 |
| Provence-Alpes-Cote d'Azur | 200912 | 187.4444 |
| Provence-Alpes-Cote d'Azur | 200913 | 220.5556 |
| Provence-Alpes-Cote d'Azur | 200914 | 0        |
| Provence-Alpes-Cote d'Azur | 201041 | 127.6    |
| Provence-Alpes-Cote d'Azur | 201042 | 127.0667 |
| Provence-Alpes-Cote d'Azur | 201043 | 134.0667 |
| Provence-Alpes-Cote d'Azur | 201044 | 0        |
| Provence-Alpes-Cote d'Azur | 201045 | 0        |
| Provence-Alpes-Cote d'Azur | 201046 | 0        |
| Provence-Alpes-Cote d'Azur | 201047 | 0        |
| Provence-Alpes-Cote d'Azur | 201048 | 67.63637 |
| Provence-Alpes-Cote d'Azur | 201049 | 400.9798 |
| Provence-Alpes-Cote d'Azur | 201050 | 474.0693 |
| Provence-Alpes-Cote d'Azur | 201051 | 945.2275 |
| Provence-Alpes-Cote d'Azur | 201052 | 1380.136 |
| Provence-Alpes-Cote d'Azur | 201101 | 1759.917 |
| Provence-Alpes-Cote d'Azur | 201102 | 1604.61  |
| Provence-Alpes-Cote d'Azur | 201103 | 2072.294 |
| Provence-Alpes-Cote d'Azur | 201104 | 2694.135 |
| Provence-Alpes-Cote d'Azur | 201105 | 2377.512 |
| Provence-Alpes-Cote d'Azur | 201106 | 2150.301 |
| Provence-Alpes-Cote d'Azur | 201107 | 1385.156 |
| Provence-Alpes-Cote d'Azur | 201108 | 937.3539 |
| Provence-Alpes-Cote d'Azur | 201109 | 529.5472 |
| Provence-Alpes-Cote d'Azur | 201110 | 215.5429 |
| Provence-Alpes-Cote d'Azur | 201111 | 54.47619 |
| Provence-Alpes-Cote d'Azur | 201112 | 87.26667 |
| Provence-Alpes-Cote d'Azur | 201113 | 85.53334 |
| Provence-Alpes-Cote d'Azur | 201114 | 79.26667 |
| Provence-Alpes-Cote d'Azur | 201141 | 0        |

|                            |        |          |
|----------------------------|--------|----------|
| Provence-Alpes-Cote d'Azur | 201142 | 0        |
| Provence-Alpes-Cote d'Azur | 201143 | 0        |
| Provence-Alpes-Cote d'Azur | 201144 | 0        |
| Provence-Alpes-Cote d'Azur | 201145 | 0        |
| Provence-Alpes-Cote d'Azur | 201146 | 0        |
| Provence-Alpes-Cote d'Azur | 201147 | 0        |
| Provence-Alpes-Cote d'Azur | 201148 | 0        |
| Provence-Alpes-Cote d'Azur | 201149 | 0        |
| Provence-Alpes-Cote d'Azur | 201150 | 0        |
| Provence-Alpes-Cote d'Azur | 201151 | 0        |
| Provence-Alpes-Cote d'Azur | 201152 | 227.5    |
| Provence-Alpes-Cote d'Azur | 201201 | 438.5449 |
| Provence-Alpes-Cote d'Azur | 201202 | 794.7967 |
| Provence-Alpes-Cote d'Azur | 201203 | 1140.853 |
| Provence-Alpes-Cote d'Azur | 201204 | 1434.214 |
| Provence-Alpes-Cote d'Azur | 201205 | 2086.039 |
| Provence-Alpes-Cote d'Azur | 201206 | 1763.869 |
| Provence-Alpes-Cote d'Azur | 201207 | 2592.356 |
| Provence-Alpes-Cote d'Azur | 201208 | 2764.646 |
| Provence-Alpes-Cote d'Azur | 201209 | 1518.991 |
| Provence-Alpes-Cote d'Azur | 201210 | 771.2355 |
| Provence-Alpes-Cote d'Azur | 201211 | 289.5274 |
| Provence-Alpes-Cote d'Azur | 201212 | 156.0417 |
| Provence-Alpes-Cote d'Azur | 201213 | 48.95834 |
| Provence-Alpes-Cote d'Azur | 201214 | 112.1111 |
| Provence-Alpes-Cote d'Azur | 201241 | 0        |
| Provence-Alpes-Cote d'Azur | 201242 | 0        |
| Provence-Alpes-Cote d'Azur | 201243 | 0        |
| Provence-Alpes-Cote d'Azur | 201244 | 63.70834 |
| Provence-Alpes-Cote d'Azur | 201245 | 75.08334 |
| Provence-Alpes-Cote d'Azur | 201246 | 85.55093 |
| Provence-Alpes-Cote d'Azur | 201247 | 163.6445 |
| Provence-Alpes-Cote d'Azur | 201248 | 450.4042 |
| Provence-Alpes-Cote d'Azur | 201249 | 615.1048 |
| Provence-Alpes-Cote d'Azur | 201250 | 1083.565 |
| Provence-Alpes-Cote d'Azur | 201251 | 1755.972 |
| Provence-Alpes-Cote d'Azur | 201252 | 2249.19  |
| Provence-Alpes-Cote d'Azur | 201301 | 1832.087 |
| Provence-Alpes-Cote d'Azur | 201302 | 1861.957 |
| Provence-Alpes-Cote d'Azur | 201303 | 1951.655 |
| Provence-Alpes-Cote d'Azur | 201304 | 2206.261 |
| Provence-Alpes-Cote d'Azur | 201305 | 2409.598 |
| Provence-Alpes-Cote d'Azur | 201306 | 2398.415 |
| Provence-Alpes-Cote d'Azur | 201307 | 2014.356 |
| Provence-Alpes-Cote d'Azur | 201308 | 2015.638 |
| Provence-Alpes-Cote d'Azur | 201309 | 1451.37  |

|                            |        |          |
|----------------------------|--------|----------|
| Provence-Alpes-Cote d'Azur | 201310 | 992.1524 |
| Provence-Alpes-Cote d'Azur | 201311 | 701.2286 |
| Provence-Alpes-Cote d'Azur | 201312 | 351.9445 |
| Provence-Alpes-Cote d'Azur | 201313 | 170.3778 |
| Provence-Alpes-Cote d'Azur | 201314 | 76.4     |
| Rhone-Alpes                | 200341 | 49.14943 |
| Rhone-Alpes                | 200342 | 161.3899 |
| Rhone-Alpes                | 200343 | 147.13   |
| Rhone-Alpes                | 200344 | 195.478  |
| Rhone-Alpes                | 200345 | 334.2794 |
| Rhone-Alpes                | 200346 | 548.932  |
| Rhone-Alpes                | 200347 | 999.2386 |
| Rhone-Alpes                | 200348 | 1404.207 |
| Rhone-Alpes                | 200349 | 1671.614 |
| Rhone-Alpes                | 200350 | 2209.16  |
| Rhone-Alpes                | 200351 | 1966.853 |
| Rhone-Alpes                | 200352 | 1464.41  |
| Rhone-Alpes                | 200401 | 831.498  |
| Rhone-Alpes                | 200402 | 514.0072 |
| Rhone-Alpes                | 200403 | 178.582  |
| Rhone-Alpes                | 200404 | 138.8142 |
| Rhone-Alpes                | 200405 | 75.74118 |
| Rhone-Alpes                | 200406 | 116.3222 |
| Rhone-Alpes                | 200407 | 73.92593 |
| Rhone-Alpes                | 200408 | 71.48148 |
| Rhone-Alpes                | 200409 | 0        |
| Rhone-Alpes                | 200410 | 66.20834 |
| Rhone-Alpes                | 200411 | 159.0556 |
| Rhone-Alpes                | 200412 | 137.1806 |
| Rhone-Alpes                | 200413 | 80.16666 |
| Rhone-Alpes                | 200414 | 0        |
| Rhone-Alpes                | 200441 | 0        |
| Rhone-Alpes                | 200442 | 0        |
| Rhone-Alpes                | 200443 | 0        |
| Rhone-Alpes                | 200444 | 0        |
| Rhone-Alpes                | 200445 | 0        |
| Rhone-Alpes                | 200446 | 18.79365 |
| Rhone-Alpes                | 200447 | 24.77778 |
| Rhone-Alpes                | 200448 | 25.19048 |
| Rhone-Alpes                | 200449 | 0        |
| Rhone-Alpes                | 200450 | 0        |
| Rhone-Alpes                | 200451 | 44.5     |
| Rhone-Alpes                | 200452 | 165.75   |
| Rhone-Alpes                | 200453 | 289.3    |
| Rhone-Alpes                | 200501 | 501.2159 |
| Rhone-Alpes                | 200502 | 610.8243 |

|             |        |          |
|-------------|--------|----------|
| Rhone-Alpes | 200503 | 978.6132 |
| Rhone-Alpes | 200504 | 1276.287 |
| Rhone-Alpes | 200505 | 1845.018 |
| Rhone-Alpes | 200506 | 2200.573 |
| Rhone-Alpes | 200507 | 1603.888 |
| Rhone-Alpes | 200508 | 1385.928 |
| Rhone-Alpes | 200509 | 1023.392 |
| Rhone-Alpes | 200510 | 873.7953 |
| Rhone-Alpes | 200511 | 691.363  |
| Rhone-Alpes | 200512 | 474.8504 |
| Rhone-Alpes | 200513 | 328.334  |
| Rhone-Alpes | 200514 | 291.0628 |
| Rhone-Alpes | 200541 | 0        |
| Rhone-Alpes | 200542 | 0        |
| Rhone-Alpes | 200543 | 0        |
| Rhone-Alpes | 200544 | 0        |
| Rhone-Alpes | 200545 | 0        |
| Rhone-Alpes | 200546 | 0        |
| Rhone-Alpes | 200547 | 0        |
| Rhone-Alpes | 200548 | 0        |
| Rhone-Alpes | 200549 | 0        |
| Rhone-Alpes | 200550 | 0        |
| Rhone-Alpes | 200551 | 0        |
| Rhone-Alpes | 200552 | 45.30952 |
| Rhone-Alpes | 200601 | 68.56571 |
| Rhone-Alpes | 200602 | 155.3626 |
| Rhone-Alpes | 200603 | 270.7036 |
| Rhone-Alpes | 200604 | 377.0088 |
| Rhone-Alpes | 200605 | 554.8231 |
| Rhone-Alpes | 200606 | 753.5302 |
| Rhone-Alpes | 200607 | 1288.483 |
| Rhone-Alpes | 200608 | 1062.939 |
| Rhone-Alpes | 200609 | 798.2757 |
| Rhone-Alpes | 200610 | 567.0797 |
| Rhone-Alpes | 200611 | 538.4614 |
| Rhone-Alpes | 200612 | 505.8459 |
| Rhone-Alpes | 200613 | 384.0313 |
| Rhone-Alpes | 200614 | 448.1645 |
| Rhone-Alpes | 200641 | 0        |
| Rhone-Alpes | 200642 | 0        |
| Rhone-Alpes | 200643 | 0        |
| Rhone-Alpes | 200644 | 0        |
| Rhone-Alpes | 200645 | 0        |
| Rhone-Alpes | 200646 | 0        |
| Rhone-Alpes | 200647 | 0        |
| Rhone-Alpes | 200648 | 0        |

|             |        |          |
|-------------|--------|----------|
| Rhone-Alpes | 200649 | 64.53334 |
| Rhone-Alpes | 200650 | 183.8842 |
| Rhone-Alpes | 200651 | 377.8601 |
| Rhone-Alpes | 200652 | 601.054  |
| Rhone-Alpes | 200701 | 576.0935 |
| Rhone-Alpes | 200702 | 751.6447 |
| Rhone-Alpes | 200703 | 663.246  |
| Rhone-Alpes | 200704 | 851.5888 |
| Rhone-Alpes | 200705 | 1097.95  |
| Rhone-Alpes | 200706 | 1341.69  |
| Rhone-Alpes | 200707 | 967.8647 |
| Rhone-Alpes | 200708 | 760.9412 |
| Rhone-Alpes | 200709 | 375.3623 |
| Rhone-Alpes | 200710 | 244.2085 |
| Rhone-Alpes | 200711 | 132.0332 |
| Rhone-Alpes | 200712 | 22.68628 |
| Rhone-Alpes | 200713 | 103      |
| Rhone-Alpes | 200714 | NA       |
| Rhone-Alpes | 200741 | NA       |
| Rhone-Alpes | 200742 | 0        |
| Rhone-Alpes | 200743 | 0        |
| Rhone-Alpes | 200744 | 0        |
| Rhone-Alpes | 200745 | 0        |
| Rhone-Alpes | 200746 | 0        |
| Rhone-Alpes | 200747 | 0        |
| Rhone-Alpes | 200748 | 47.58333 |
| Rhone-Alpes | 200749 | 137.2668 |
| Rhone-Alpes | 200750 | 311.4315 |
| Rhone-Alpes | 200751 | 399.3962 |
| Rhone-Alpes | 200752 | 438.9611 |
| Rhone-Alpes | 200801 | 580.8611 |
| Rhone-Alpes | 200802 | 884.6328 |
| Rhone-Alpes | 200803 | 1026.701 |
| Rhone-Alpes | 200804 | 1115.597 |
| Rhone-Alpes | 200805 | 1050.684 |
| Rhone-Alpes | 200806 | 1169.415 |
| Rhone-Alpes | 200807 | 1102.099 |
| Rhone-Alpes | 200808 | 942.2784 |
| Rhone-Alpes | 200809 | 884.1732 |
| Rhone-Alpes | 200810 | 638.7928 |
| Rhone-Alpes | 200811 | 528.9791 |
| Rhone-Alpes | 200812 | 440.4842 |
| Rhone-Alpes | 200813 | 503.2711 |
| Rhone-Alpes | 200814 | 397.3026 |
| Rhone-Alpes | 200841 | 0        |
| Rhone-Alpes | 200842 | 0        |

|             |        |          |
|-------------|--------|----------|
| Rhone-Alpes | 200843 | 0        |
| Rhone-Alpes | 200844 | 0        |
| Rhone-Alpes | 200845 | 0        |
| Rhone-Alpes | 200846 | 0        |
| Rhone-Alpes | 200847 | 27.18518 |
| Rhone-Alpes | 200848 | 33.72839 |
| Rhone-Alpes | 200849 | 81.84046 |
| Rhone-Alpes | 200850 | 167.2331 |
| Rhone-Alpes | 200851 | 442.8937 |
| Rhone-Alpes | 200852 | 566.1439 |
| Rhone-Alpes | 200901 | 852.6479 |
| Rhone-Alpes | 200902 | 1191.266 |
| Rhone-Alpes | 200903 | 1466.145 |
| Rhone-Alpes | 200904 | 1862.037 |
| Rhone-Alpes | 200905 | 1596.435 |
| Rhone-Alpes | 200906 | 1118.809 |
| Rhone-Alpes | 200907 | 783.75   |
| Rhone-Alpes | 200908 | 398.7781 |
| Rhone-Alpes | 200909 | 354.5502 |
| Rhone-Alpes | 200910 | 364.497  |
| Rhone-Alpes | 200911 | 268.3302 |
| Rhone-Alpes | 200912 | 201.6667 |
| Rhone-Alpes | 200913 | 105.5833 |
| Rhone-Alpes | 200914 | 90.66667 |
| Rhone-Alpes | 201041 | 0        |
| Rhone-Alpes | 201042 | 0        |
| Rhone-Alpes | 201043 | 0        |
| Rhone-Alpes | 201044 | 0        |
| Rhone-Alpes | 201045 | 16.87037 |
| Rhone-Alpes | 201046 | 21.59259 |
| Rhone-Alpes | 201047 | 23.03704 |
| Rhone-Alpes | 201048 | 53.8     |
| Rhone-Alpes | 201049 | 152.88   |
| Rhone-Alpes | 201050 | 363.3319 |
| Rhone-Alpes | 201051 | 588.8697 |
| Rhone-Alpes | 201052 | 856.388  |
| Rhone-Alpes | 201101 | 1315.212 |
| Rhone-Alpes | 201102 | 1273.451 |
| Rhone-Alpes | 201103 | 1363.8   |
| Rhone-Alpes | 201104 | 1578.769 |
| Rhone-Alpes | 201105 | 1935.826 |
| Rhone-Alpes | 201106 | 1921.912 |
| Rhone-Alpes | 201107 | 1660.552 |
| Rhone-Alpes | 201108 | 1070.417 |
| Rhone-Alpes | 201109 | 504.2619 |
| Rhone-Alpes | 201110 | 324.8943 |

|             |        |          |
|-------------|--------|----------|
| Rhone-Alpes | 201111 | 181.9125 |
| Rhone-Alpes | 201112 | 68.79166 |
| Rhone-Alpes | 201113 | 34.8     |
| Rhone-Alpes | 201114 | 0        |
| Rhone-Alpes | 201141 | 24.57407 |
| Rhone-Alpes | 201142 | 23.07407 |
| Rhone-Alpes | 201143 | 0        |
| Rhone-Alpes | 201144 | 0        |
| Rhone-Alpes | 201145 | 0        |
| Rhone-Alpes | 201146 | 0        |
| Rhone-Alpes | 201147 | 0        |
| Rhone-Alpes | 201148 | 0        |
| Rhone-Alpes | 201149 | 0        |
| Rhone-Alpes | 201150 | 0        |
| Rhone-Alpes | 201151 | 0        |
| Rhone-Alpes | 201152 | 60.7037  |
| Rhone-Alpes | 201201 | 245.5896 |
| Rhone-Alpes | 201202 | 340.6547 |
| Rhone-Alpes | 201203 | 554.1437 |
| Rhone-Alpes | 201204 | 671.0828 |
| Rhone-Alpes | 201205 | 1032.55  |
| Rhone-Alpes | 201206 | 1512.676 |
| Rhone-Alpes | 201207 | 1454.519 |
| Rhone-Alpes | 201208 | 1466.794 |
| Rhone-Alpes | 201209 | 1179.736 |
| Rhone-Alpes | 201210 | 1047.395 |
| Rhone-Alpes | 201211 | 888.9077 |
| Rhone-Alpes | 201212 | 645.4519 |
| Rhone-Alpes | 201213 | 503.4386 |
| Rhone-Alpes | 201214 | 370.8684 |
| Rhone-Alpes | 201241 | 0        |
| Rhone-Alpes | 201242 | 0        |
| Rhone-Alpes | 201243 | 0        |
| Rhone-Alpes | 201244 | 26.71795 |
| Rhone-Alpes | 201245 | 81.73219 |
| Rhone-Alpes | 201246 | 72.76923 |
| Rhone-Alpes | 201247 | 62.86222 |
| Rhone-Alpes | 201248 | 106.1427 |
| Rhone-Alpes | 201249 | 287.6412 |
| Rhone-Alpes | 201250 | 575.7064 |
| Rhone-Alpes | 201251 | 852.9135 |
| Rhone-Alpes | 201252 | 853.3449 |
| Rhone-Alpes | 201301 | 1081.405 |
| Rhone-Alpes | 201302 | 1270.218 |
| Rhone-Alpes | 201303 | 1521.149 |
| Rhone-Alpes | 201304 | 2117.586 |



|             |        |          |
|-------------|--------|----------|
| Rhone-Alpes | 201305 | 2704.858 |
| Rhone-Alpes | 201306 | 2476.358 |
| Rhone-Alpes | 201307 | 2027.843 |
| Rhone-Alpes | 201308 | 1513.762 |
| Rhone-Alpes | 201309 | 1075.817 |
| Rhone-Alpes | 201310 | 749.0636 |
| Rhone-Alpes | 201311 | 418.7233 |
| Rhone-Alpes | 201312 | 299.0988 |
| Rhone-Alpes | 201313 | 224.7269 |
| Rhone-Alpes | 201314 | 147.1149 |
